# Supplementary material
Source: PubMed Central journal article supplement (PMC6705136)

## Supplementary Online Content

Anderson TS, Jing B, Auerbach A, et al. Clinical outcomes after intensifying antihypertensive medication regimens among older adults at hospital discharge. *JAMA Intern Med*. Published online August 19, 2019. doi:10.1001/jamainternmed.2019.3007

**eMethods.** Statistical Software Programs Used in Analyses

**eTable 1.** Serious Adverse Event Outcome Definitions

**eTable 2.** Cardiovascular Event Outcome Definitions

**eTable 3.** Complete Baseline Characteristics Before and After Propensity Score Matching

**eTable 4.** Components of Composite Outcomes Associated with Receiving Antihypertensive Intensifications at Hospital Discharge

**eTable 5.** Baseline Characteristics Before and After Propensity Score Matching, Well-Controlled Baseline BP Subgroup

**eTable 6.** Baseline Characteristics Before and After Propensity Score Matching, Elevated Baseline BP Subgroup

**eTable 7.** Secondary Clinical Outcomes Associated with Receiving Antihypertensive Intensifications at Hospital Discharge in Well-Controlled and Elevated Baseline Blood Pressure Subgroups

**eTable 8.** Changes in Systolic Blood Pressure Following Hospital Discharge in Well-Controlled and Elevated Baseline BP Subgroups

**eFigure 1.** Primary Cohort Propensity Score Balance Diagnostics

**eFigure 2.** Propensity Score Distribution Before and After Matching

This supplementary material has been provided by the authors to give readers additional information about their work.

**eMethods.** Statistical Software Programs Used in Analyses

The following programs were employed using SAS version 9.3 (SAS Institute Inc):

- *PROC MI* for multiple imputation

The following programs were employed using Stata version 14.1 (StataCorp):

- *psmatch2* for propensity score matching
- *pstest* for assessing propensity score covariate balance
- *stcrreg* for competing risk regressions
- *stcox* for Cox proportional hazard regressions
- *regression* with post-estimation margins and bootstrapping for blood pressure difference-in-differences analyses
- *evaluate* for e-value estimation.

Detailed software code is available by request to the corresponding author.

**eTable 1. Serious Adverse Event Outcome Definitions**

| <b>Outcome</b>                    | <b>ICD-9 Codes</b>                                                                                 |
|-----------------------------------|----------------------------------------------------------------------------------------------------|
| Injurious fall <sup>a</sup>       | Fall-related E-code code (817, 824, 880-888, or 927)<br><b>AND</b> an injury code (800 to 994.99). |
| Acute kidney injury               | 584.X Acute kidney failure                                                                         |
| Syncope                           | 780.2 Syncope                                                                                      |
|                                   | 992.1 Heat Syncope                                                                                 |
|                                   | 458.0 Orthostatic hypotension                                                                      |
| Electrolyte disturbances          | 276.0 Hyperosmolality and/or hypernatremia                                                         |
|                                   | 276.1 Hyposmolality and/or hyponatremia                                                            |
|                                   | 276.2 Acidosis                                                                                     |
|                                   | 276.3 Alkalosis                                                                                    |
|                                   | 276.4 Mixed acid-base balance disorder                                                             |
|                                   | 276.7 Hyperpotassemia                                                                              |
|                                   | 276.8 Hypopotassemia                                                                               |
|                                   | 276.9 Electrolyte and fluid disorders not elsewhere classified                                     |
| Hypotension                       | 458.1 Iatrogenic hypotension NEC                                                                   |
|                                   | 458.8 Hypotension NEC                                                                              |
|                                   | 458.9 Hypotension NOS                                                                              |
| Medication poisoning <sup>b</sup> | 972.6 Poisoning by other antihypertensive agents                                                   |
|                                   | 972.5 Poisoning by other vasodilators                                                              |
|                                   | 972.3 Poisoning by ganglion-blocking agents                                                        |
|                                   | 974.0 Poisoning by mercurial diuretics                                                             |
|                                   | 974.1 Poisoning by purine derivative diuretics                                                     |
|                                   | 974.4 Poisoning by other diuretics                                                                 |
|                                   | E944.0 Mercurial diuretics causing adverse effects in therapeutic use                              |
|                                   | E942.0 Cardiac rhythm regulators causing adv eff in therapeutic use                                |
|                                   | E942.5 Other vasodilators causing adverse effects in therapeutic use                               |
|                                   | E942.6 Other antihypertensive agents causing adverse effects in therapeutic use                    |
|                                   | E942.3 Ganglion-blocking agents causing adverse effects in therapeutic use                         |
|                                   | E944.1 Purine derivative diuretics causing adverse effects in therapeutic use                      |
|                                   | E944.4 Other diuretics causing adverse effects in therapeutic use                                  |

<sup>a</sup> Source: Tinetti ME, Baker DI, King M, et al. Effect of dissemination of evidence in reducing injuries from falls. *N Engl J Med.* 2008;359(3):252-61.

<sup>b</sup> Source: Poudel DR, Acharya P, Ghimire S, Dhital R, Bharati R. Burden of hospitalizations related to adverse drug events in the USA: a retrospective analysis from large inpatient database. *Pharmacoepidemiol Drug Saf.* 2017;26(6):635-641.

**eTable 2. Cardiovascular Event Outcome Definitions**

| <b>Outcome</b>                                         | <b>ICD-9 Codes</b>                                                                                                                                                |
|--------------------------------------------------------|-------------------------------------------------------------------------------------------------------------------------------------------------------------------|
| Acute myocardial infarction                            | 410.xx excluding those with 410.x2                                                                                                                                |
| Acute coronary syndrome / Unstable angina              | 411.1 Intermediate coronary syndrome                                                                                                                              |
|                                                        | 411.8 Other acute and subacute forms of ischemic heart disease                                                                                                    |
|                                                        | 411.81 Acute coronary occlusion without myocardial infarction                                                                                                     |
|                                                        | 411.89 Other acute and subacute forms of ischemic heart disease, other                                                                                            |
| Heart failure                                          | 402.01 Malignant hypertensive heart disease with heart failure                                                                                                    |
|                                                        | 402.11 Benign hypertensive heart disease with heart failure                                                                                                       |
|                                                        | 402.91 Unspecified hypertensive heart disease with heart failure                                                                                                  |
|                                                        | 404.01 Hypertensive heart and chronic kidney disease, malignant, with heart failure and with chronic kidney disease stage I through stage IV, or unspecified      |
|                                                        | 404.03 Hypertensive heart and chronic kidney disease, malignant, with heart failure and with chronic kidney disease stage V or end stage renal disease            |
|                                                        | 404.11 Hypertensive heart and chronic kidney disease, benign, with heart failure and with chronic kidney disease stage I through stage IV, or unspecified         |
|                                                        | 404.13 Hypertensive heart and chronic kidney disease, benign, with heart failure and chronic kidney disease stage V or end stage renal disease                    |
|                                                        | 404.91 Hypertensive heart and chronic kidney disease, unspecified, with heart failure and with chronic kidney disease stage I through stage IV, or unspecified    |
|                                                        | 404.93 Hypertensive heart and chronic kidney disease, unspecified, with heart failure and chronic kidney disease stage V or end stage renal disease               |
|                                                        | 428.x Heart failure                                                                                                                                               |
|                                                        | Stroke                                                                                                                                                            |
| 362.32 retinal arterial branch occlusion               |                                                                                                                                                                   |
| 362.33 partial retinal arterial occlusion              |                                                                                                                                                                   |
| 362.34 transient retinal arterial occlusion            |                                                                                                                                                                   |
| 430.xx, Subarachnoid hemorrhage                        |                                                                                                                                                                   |
| 431.xx Intracerebral hemorrhage                        |                                                                                                                                                                   |
| 432.xx Other and unspecified intracranial hemorrhage   |                                                                                                                                                                   |
| 433.xx Occlusion and stenosis of precerebral arteries  |                                                                                                                                                                   |
| 434.xx Occlusion of cerebral arteries                  |                                                                                                                                                                   |
| 435.xx Transient cerebral ischemia                     |                                                                                                                                                                   |
| 436.xx Acute, but ill-defined, cerebrovascular disease |                                                                                                                                                                   |
| Hypertension                                           | 401.x Essential hypertension                                                                                                                                      |
|                                                        | 402.00 Malignant hypertensive heart disease without heart failure                                                                                                 |
|                                                        | 402.10 Benign hypertensive heart disease without heart failure                                                                                                    |
|                                                        | 402.90 Unspecified hypertensive heart disease without heart failure                                                                                               |
|                                                        | 403.x Hypertensive chronic kidney disease                                                                                                                         |
|                                                        | 404.00 Hypertensive heart and chronic kidney disease, malignant, without heart failure and with chronic kidney disease stage I through stage IV, or unspecified   |
|                                                        | 404.02 Hypertensive heart and chronic kidney disease, malignant, without heart failure and with chronic kidney disease stage V or end stage renal disease         |
|                                                        | 404.10 Hypertensive heart and chronic kidney disease, benign, without heart failure and with chronic kidney disease stage I through stage IV, or unspecified      |
|                                                        | 404.12 Hypertensive heart and chronic kidney disease, benign, without heart failure and with chronic kidney disease stage V or end stage renal disease            |
|                                                        | 404.90 Hypertensive heart and chronic kidney disease, unspecified, without heart failure and with chronic kidney disease stage I through stage IV, or unspecified |
|                                                        | 404.92 Hypertensive heart and chronic kidney disease, unspecified, without heart failure and with chronic kidney disease stage V or end stage renal disease       |
|                                                        | 405.x Secondary hypertension                                                                                                                                      |
|                                                        | 437.2 Hypertensive encephalopathy                                                                                                                                 |

**Sources:**

Dharmarajan K, Wang Y, Lin Z, et al. Association of Changing Hospital Readmission Rates With Mortality Rates After Hospital Discharge. *JAMA*. 2017;318(3):270-278.

Hawn MT, Graham LA, Richman JS, et al. Risk of major adverse cardiac events following noncardiac surgery in patients with coronary stents. *JAMA*. 2013;310(14):1462-72.

**eTable 3.** Complete Baseline Characteristics Before and After Propensity Score Matching

| Characteristics                                                      | Before Propensity Score Matching |                           |          | After Propensity Score Matching <sup>a</sup> |                          |       |
|----------------------------------------------------------------------|----------------------------------|---------------------------|----------|----------------------------------------------|--------------------------|-------|
|                                                                      | Intensified (N=2074)             | Not intensified (N=12841) | SMD      | Intensified (N=2028)                         | Not intensified (N=2028) | SMD   |
| Age, mean (SD), y                                                    | 76.8 (8.4)                       | 76.6 (8.6)                | -0.02    | 76.8 (8.4)                                   | 76.6 (8.7)               | -0.02 |
| Female sex, No. (%)                                                  | 52 (2.5)                         | 326 (2.5)                 | 0.00     | 51 (2.5)                                     | 44 (2.2)                 | 0.02  |
| Race/ethnicity, No. (%)                                              |                                  |                           |          |                                              |                          |       |
| White                                                                | 1450 (69.9)                      | 10036 (78.2)              | 0.20     | 1428 (70.4)                                  | 1432 (70.6)              | 0.03  |
| Black                                                                | 507 (24.4)                       | 2192 (17.1)               |          | 487 (24)                                     | 482 (23.8)               |       |
| Hispanic                                                             | 55 (2.7)                         | 222 (1.7)                 |          | 52 (2.6)                                     | 45 (2.2)                 |       |
| Other                                                                | 62 (3)                           | 391 (3)                   |          | 61 (3)                                       | 69 (3.4)                 |       |
| Median zip code household income, mean (SD), \$ <sup>b</sup>         | 45950 (19949)                    | 47573 (18939)             | 0.08     | 46052 (20032)                                | 45450 (18990)            | -0.03 |
| VISN, No. (%) <sup>c</sup>                                           |                                  |                           |          |                                              |                          |       |
| New England Health Care System                                       | 54 (2.6)                         | 576 (4.5)                 | 0.19     | 53 (2.6)                                     | 53 (2.6)                 | 0.09  |
| Healthcare New York/New Jersey                                       | 126 (6.1)                        | 781 (6.1)                 |          | 124 (6.1)                                    | 129 (6.4)                |       |
| VISN4 Network                                                        | 69 (3.3)                         | 517 (4)                   |          | 68 (3.4)                                     | 71 (3.5)                 |       |
| Capitol Healthcare Network                                           | 85 (4.1)                         | 477 (3.7)                 |          | 82 (4)                                       | 67 (3.3)                 |       |
| Mid-Atlantic Health Care Network                                     | 114 (5.5)                        | 804 (6.3)                 |          | 109 (5.4)                                    | 97 (4.8)                 |       |
| Southeast Network                                                    | 114 (5.5)                        | 606 (4.7)                 |          | 112 (5.5)                                    | 119 (5.9)                |       |
| Sunshine Healthcare Network                                          | 214 (10.3)                       | 1234 (9.6)                |          | 212 (10.5)                                   | 216 (10.7)               |       |
| MidSouth Healthcare Network                                          | 149 (7.2)                        | 923 (7.2)                 |          | 147 (7.2)                                    | 151 (7.4)                |       |
| Healthcare System                                                    | 61 (2.9)                         | 342 (2.7)                 |          | 58 (2.9)                                     | 68 (3.4)                 |       |
| Great Lakes Healthcare System                                        | 205 (9.9)                        | 1077 (8.4)                |          | 197 (9.7)                                    | 213 (10.5)               |       |
| Heartland Network                                                    | 89 (4.3)                         | 640 (5)                   |          | 87 (4.3)                                     | 90 (4.4)                 |       |
| South Central VA Healthcare Network                                  | 283 (13.6)                       | 1396 (10.9)               |          | 273 (13.5)                                   | 277 (13.7)               |       |
| Heart of Texas Healthcare System                                     | 92 (4.4)                         | 621 (4.8)                 |          | 92 (4.5)                                     | 83 (4.1)                 |       |
| Southwest Healthcare Network                                         | 87 (4.2)                         | 558 (4.3)                 |          | 86 (4.2)                                     | 82 (4)                   |       |
| Rocky Mountain Network                                               | 33 (1.6)                         | 336 (2.6)                 |          | 33 (1.6)                                     | 23 (1.1)                 |       |
| Northwest Health Network                                             | 41 (2)                           | 392 (3.1)                 |          | 41 (2)                                       | 44 (2.2)                 |       |
| Sierra Pacific Network                                               | 85 (4.1)                         | 501 (3.9)                 | 85 (4.2) | 73 (3.6)                                     |                          |       |
| Desert Pacific Healthcare Network                                    | 93 (4.5)                         | 615 (4.8)                 | 90 (4.4) | 97 (4.8)                                     |                          |       |
| Midwest Healthcare Network                                           | 80 (3.9)                         | 445 (3.5)                 | 79 (3.9) | 75 (3.7)                                     |                          |       |
| <b>Pre-admission clinical characteristics, mean (SD)<sup>b</sup></b> |                                  |                           |          |                                              |                          |       |
| Body mass index, kg/m <sup>2</sup>                                   | 27.9 (6.7)                       | 27.6 (6.5)                | -0.05    | 27.9 (6.7)                                   | 28.1 (6.7)               | 0.02  |
| Pulse, bpm                                                           | 73.6 (12.7)                      | 74.6 (12.5)               | 0.08     | 73.6 (12.7)                                  | 73.9 (12.5)              | 0.02  |
| Systolic BP, mmHg                                                    | 138.6 (19)                       | 132.3 (17.1)              | -0.34    | 138.3 (18.9)                                 | 137.9 (18.9)             | -0.02 |
| <b>Characteristics of index hospitalization</b>                      |                                  |                           |          |                                              |                          |       |
| Length of stay, mean (SD), d                                         | 6.8 (7.3)                        | 5.4 (6.7)                 | -0.2     | 6.7 (7.1)                                    | 7.1 (11.6)               | 0.04  |
| Year of hospitalization, No. (%)                                     |                                  |                           |          |                                              |                          |       |
| 2011                                                                 | 786 (37.9)                       | 4761 (37.1)               | 0.03     | 766 (37.8)                                   | 774 (38.2)               | 0.03  |
| 2012                                                                 | 681 (32.8)                       | 4153 (32.3)               |          | 668 (32.9)                                   | 683 (33.7)               |       |
| 2013                                                                 | 607 (29.3)                       | 3927 (30.6)               |          | 594 (29.3)                                   | 571 (28.2)               |       |

|                                                                                       |               |               |       |               |               |       |
|---------------------------------------------------------------------------------------|---------------|---------------|-------|---------------|---------------|-------|
| <b>Inpatient SBP, No (%)<sup>b</sup></b>                                              |               |               |       |               |               |       |
| ≥3 reading < 90 mmHg                                                                  | 45 (2.2)      | 419 (3.3)     | 0.07  | 44 (2.2)      | 42 (2.1)      | 0.01  |
| ≥3 readings ≥160 mmHg                                                                 | 719 (34.7)    | 2041 (15.9)   | 0.44  | 711 (35.1)    | 760 (37.5)    | -0.06 |
| ≥3 readings ≥180 mmHg                                                                 | 349 (16.8)    | 428 (3.3)     | 0.46  | 311 (15.3)    | 278 (13.7)    | 0.06  |
| <b>Inpatient pulse, No (%)<sup>b</sup></b>                                            |               |               |       |               |               |       |
| ≥3 readings < 60 bpm                                                                  | 464 (22.4)    | 2073 (16.1)   | 0.16  | 447 (22)      | 437 (21.5)    | 0.01  |
| ≥3 readings ≥100 bpm                                                                  | 96 (4.6)      | 743 (5.8)     | 0.05  | 95 (4.7)      | 93 (4.6)      | 0.00  |
| <b>Discharge diagnosis, No (%)</b>                                                    |               |               |       |               |               |       |
| Pneumonia                                                                             | 1045 (50.4)   | 6681 (52)     | 0.05  | 1027 (50.6)   | 1019 (50.2)   | 0.01  |
| Urinary tract infection                                                               | 790 (38.1)    | 4849 (37.8)   |       | 771 (38)      | 773 (38.1)    |       |
| Venous thromboembolism                                                                | 239 (11.5)    | 1311 (10.2)   |       | 230 (11.3)    | 236 (11.6)    |       |
| <b>Laboratory values at index hospitalization discharge, mean (SD)<sup>b, d</sup></b> |               |               |       |               |               |       |
| Hemoglobin, g/dL                                                                      | 11.5 (1.9)    | 11.5 (1.8)    | -0.02 | 11.5 (1.9)    | 11.5 (1.8)    | -0.02 |
| Platelets, k/mm <sup>3</sup>                                                          | 234.2 (102.2) | 231.8 (101.4) | -0.02 | 234.2 (101.9) | 236.1 (101.2) | 0.02  |
| Sodium, mEq/L                                                                         | 138.2 (3.5)   | 138.1 (3.5)   | -0.01 | 138.2 (3.5)   | 138.2 (3.7)   | 0.02  |
| Potassium, mEq/L                                                                      | 4.1 (0.5)     | 4.1 (0.5)     | -0.06 | 4.1 (0.5)     | 4.1 (0.5)     |       |
| Blood urea nitrogen, mg/dL                                                            | 23.9 (15.1)   | 21.5 (12.7)   | -0.17 | 23.8 (15.1)   | 23.9 (15.2)   | 0.01  |
| Carbon dioxide, mEq/L                                                                 | 26.3 (4.1)    | 26 (3.9)      | -0.08 | 26.3 (4.1)    | 26.4 (4.1)    | 0.02  |
| Estimated glomerular filtration rate, mL/min per 1.73 m <sup>2</sup>                  | 66.3 (32.1)   | 71.2 (31.8)   | 0.16  | 66.5 (32.1)   | 66.8 (32.2)   | 0.01  |
| <b>Health Care Use, No. (%)</b>                                                       |               |               |       |               |               |       |
| Medicare utilization in prior year                                                    | 565 (27.2)    | 3603 (28.1)   | 0.02  | 557 (27.5)    | 569 (28.1)    | 0.01  |
| No. ED visits in the year preceding index hospitalization                             |               |               |       |               |               |       |
| 0                                                                                     | 853 (41.1)    | 5335 (41.5)   | 0.03  | 832 (41)      | 831 (41)      | 0.01  |
| 1                                                                                     | 536 (25.8)    | 3159 (24.6)   |       | 527 (26)      | 533 (26.3)    |       |
| 2                                                                                     | 293 (14.1)    | 1792 (14)     |       | 283 (14)      | 281 (13.9)    |       |
| ≥3                                                                                    | 392 (18.9)    | 2555 (19.9)   |       | 386 (19)      | 383 (18.9)    |       |
| No. hospitalizations in the year preceding index hospitalization                      |               |               |       |               |               |       |
| 0                                                                                     | 744 (35.9)    | 4330 (33.7)   | 0.05  | 726 (35.8)    | 683 (33.7)    | 0.06  |
| 1                                                                                     | 449 (21.6)    | 2946 (22.9)   |       | 439 (21.6)    | 471 (23.2)    |       |
| 2                                                                                     | 310 (14.9)    | 1914 (14.9)   |       | 301 (14.8)    | 322 (15.9)    |       |
| ≥3                                                                                    | 571 (27.5)    | 3651 (28.4)   |       | 562 (27.7)    | 552 (27.2)    |       |
| ≥ 8 admission medications (polypharmacy)                                              | 914 (44.1)    | 6387 (49.7)   | 0.11  | 910 (44.9)    | 921 (45.4)    | 0.01  |
| Serious fall in prior year                                                            | 94 (4.5)      | 569 (4.4)     | 0.00  | 93 (4.6)      | 89 (4.4)      | 0.01  |
| <b>Antihypertensive use patterns, No (%)</b>                                          |               |               |       |               |               |       |
| Admission antihypertensive use and adherence <sup>e</sup>                             |               |               |       |               |               |       |
| 0 antihypertensives                                                                   | 526 (25.4)    | 3077 (24)     | 0.19  | 501 (24.7)    | 508 (25)      | 0.05  |
| 1 antihypertensive, PDC≤80%                                                           | 270 (13)      | 1289 (10)     |       | 261 (12.9)    | 278 (13.7)    |       |
| 1 antihypertensive, PDC>80%                                                           | 282 (13.6)    | 2255 (17.6)   |       | 281 (13.9)    | 294 (14.5)    |       |
| 2 antihypertensives, PDC≤80%                                                          | 221 (10.7)    | 1032 (8)      |       | 215 (10.6)    | 207 (10.2)    |       |
| 2 antihypertensive, PDC>80%                                                           | 327 (15.8)    | 2378 (18.5)   |       | 324 (16)      | 302 (14.9)    |       |
| ≥3 antihypertensive, PDC≤80%                                                          | 138 (6.7)     | 668 (5.2)     |       | 136 (6.7)     | 140 (6.9)     |       |
| ≥3 antihypertensive, PDC>80%                                                          | 310 (14.9)    | 2142 (16.7)   |       | 310 (15.3)    | 299 (14.7)    |       |

|                                                                                         |             |             |      |             |             |      |
|-----------------------------------------------------------------------------------------|-------------|-------------|------|-------------|-------------|------|
| No. antihypertensives filled in year prior to index hospitalization                     |             |             |      |             |             |      |
| 0                                                                                       | 232 (11.2)  | 2071 (16.1) | 0.21 | 232 (11.4)  | 229 (11.3)  | 0.03 |
| 1                                                                                       | 460 (22.2)  | 3324 (25.9) |      | 455 (22.4)  | 479 (23.6)  |      |
| 2                                                                                       | 604 (29.1)  | 3577 (27.9) |      | 589 (29)    | 583 (28.7)  |      |
| 3                                                                                       | 418 (20.2)  | 2320 (18.1) |      | 410 (20.2)  | 393 (19.4)  |      |
| 4                                                                                       | 242 (11.7)  | 1054 (8.2)  |      | 231 (11.4)  | 234 (11.5)  |      |
| 5                                                                                       | 118 (5.7)   | 495 (3.9)   |      | 111 (5.5)   | 110 (5.4)   |      |
| <b>Cardiovascular medication classes used at hospital admission, No (%)<sup>f</sup></b> |             |             |      |             |             |      |
| Angiotensin-converting enzyme inhibitors                                                | 656 (31.6)  | 4302 (33.5) | 0.04 | 650 (32.1)  | 648 (32)    | 0.00 |
| Angiotensin II inhibitors                                                               | 175 (8.4)   | 1121 (8.7)  | 0.01 | 174 (8.6)   | 167 (8.2)   | 0.01 |
| Beta blockers                                                                           | 883 (42.6)  | 5481 (42.7) | 0.00 | 873 (43)    | 854 (42.1)  | 0.02 |
| Calcium channel blockers                                                                | 587 (28.3)  | 3759 (29.3) | 0.02 | 579 (28.6)  | 584 (28.8)  | 0.01 |
| Non-loop diuretics                                                                      | 423 (20.4)  | 2528 (19.7) | 0.02 | 416 (20.5)  | 415 (20.5)  | 0.00 |
| Loop diuretics                                                                          | 332 (16)    | 2396 (18.7) | 0.07 | 331 (16.3)  | 309 (15.2)  | 0.03 |
| Other antihypertensives                                                                 | 230 (11.1)  | 1046 (8.1)  | 0.10 | 224 (11)    | 205 (10.1)  | 0.03 |
| Alpha blockers                                                                          | 641 (30.9)  | 4121 (32.1) | 0.03 | 631 (31.1)  | 627 (30.9)  | 0.00 |
| Anti-lipemic agents                                                                     | 1040 (50.1) | 6890 (53.7) | 0.07 | 1025 (50.5) | 1032 (50.9) | 0.01 |
| Antianginals                                                                            | 231 (11.1)  | 1303 (10.1) | 0.03 | 227 (11.2)  | 220 (10.8)  | 0.01 |
| Anti-arrhythmics                                                                        | 20 (1)      | 102 (0.8)   | 0.02 | 20 (1)      | 14 (0.7)    | 0.03 |
| Digitalis                                                                               | 34 (1.6)    | 243 (1.9)   | 0.02 | 34 (1.7)    | 26 (1.3)    | 0.03 |
| <b>Other medication classes used at hospital admission, No. (%)<sup>f</sup></b>         |             |             |      |             |             |      |
| Anti-histamines                                                                         | 270 (13)    | 1850 (14.4) | 0.04 | 268 (13.2)  | 274 (13.5)  | 0.01 |
| Anti-microbials                                                                         | 86 (4.1)    | 612 (4.8)   | 0.03 | 86 (4.2)    | 83 (4.1)    | 0.01 |
| Anti-neoplastics                                                                        | 62 (3)      | 451 (3.5)   | 0.03 | 61 (3)      | 59 (2.9)    | 0.01 |
| Autonomic medications                                                                   | 43 (2.1)    | 311 (2.4)   | 0.02 | 42 (2.1)    | 37 (1.8)    | 0.02 |
| Anticoagulants                                                                          | 96 (4.6)    | 598 (4.7)   | 0.00 | 93 (4.6)    | 89 (4.4)    | 0.01 |
| Platelet aggregation inhibitors (including aspirin)                                     | 201 (9.7)   | 1206 (9.4)  | 0.01 | 198 (9.8)   | 198 (9.8)   | 0.00 |
| Other central nervous system medications                                                | 215 (10.4)  | 1459 (11.4) | 0.03 | 214 (10.6)  | 209 (10.3)  | 0.01 |
| Non-opioid analgesics                                                                   | 581 (28)    | 3741 (29.1) | 0.02 | 571 (28.2)  | 569 (28.1)  | 0.00 |
| Opioid analgesics                                                                       | 467 (22.5)  | 2915 (22.7) | 0.00 | 455 (22.4)  | 472 (23.3)  | 0.02 |
| Sedatives and hypnotics                                                                 | 242 (11.7)  | 1693 (13.2) | 0.05 | 239 (11.8)  | 235 (11.6)  | 0.01 |
| Anti-convulsants                                                                        | 361 (17.4)  | 2520 (19.6) | 0.06 | 360 (17.8)  | 377 (18.6)  | 0.02 |
| Anti-depressants                                                                        | 540 (26)    | 3735 (29.1) | 0.07 | 532 (26.2)  | 566 (27.9)  | 0.04 |
| Anti-psychotics                                                                         | 126 (6.1)   | 832 (6.5)   | 0.02 | 123 (6.1)   | 121 (6)     | 0.00 |
| Gastrointestinal medications                                                            | 1064 (51.3) | 7043 (54.8) | 0.07 | 1048 (51.7) | 1051 (51.8) | 0.00 |
| Genitourinary medications                                                               | 197 (9.5)   | 1376 (10.7) | 0.04 | 194 (9.6)   | 204 (10.1)  | 0.02 |
| Hormones                                                                                | 612 (29.5)  | 4141 (32.2) | 0.06 | 604 (29.8)  | 585 (28.8)  | 0.02 |
| Insulin                                                                                 | 400 (19.3)  | 2695 (21)   | 0.04 | 394 (19.4)  | 433 (21.4)  | 0.05 |
| Non-insulin hypoglycemics                                                               | 352 (17)    | 1747 (13.6) | 0.09 | 338 (16.7)  | 347 (17.1)  | 0.01 |
| Musculoskeletal medications                                                             | 377 (18.2)  | 2577 (20.1) | 0.05 | 373 (18.4)  | 382 (18.8)  | 0.01 |
| Systemic decongestants and antitussives                                                 | 102 (4.9)   | 815 (6.3)   | 0.06 | 102 (5)     | 93 (4.6)    | 0.02 |
| <b>Comorbidities, No. (%)<sup>g</sup></b>                                               |             |             |      |             |             |      |
| Heart failure                                                                           | 715 (34.5)  | 3272 (25.5) | 0.20 | 691 (34.1)  | 729 (35.9)  | 0.04 |
| Acute myocardial infarction                                                             | 116 (5.6)   | 610 (4.8)   | 0.04 | 112 (5.5)   | 102 (5)     | 0.02 |
| Unstable angina and other acute ischemic heart disease                                  | 95 (4.6)    | 540 (4.2)   | 0.02 | 93 (4.6)    | 98 (4.8)    | 0.01 |
| Chronic angina and coronary artery disease                                              | 895 (43.2)  | 5239 (40.8) | 0.05 | 880 (43.4)  | 890 (43.9)  | 0.01 |



|                                                                                             |             |              |      |             |             |      |
|---------------------------------------------------------------------------------------------|-------------|--------------|------|-------------|-------------|------|
| Valvular/rheumatic heart disease                                                            | 263 (12.7)  | 1508 (11.7)  | 0.03 | 262 (12.9)  | 247 (12.2)  | 0.02 |
| Other cardiac disease including congenital heart and hypertensive disease                   | 1375 (66.3) | 7735 (60.2)  | 0.13 | 1339 (66)   | 1342 (66.2) | 0.00 |
| Arrhythmias and conduction disorders                                                        | 666 (32.1)  | 4225 (32.9)  | 0.02 | 649 (32)    | 632 (31.2)  | 0.02 |
| Pleural effusion/pneumothorax                                                               | 287 (13.8)  | 1738 (13.5)  | 0.01 | 280 (13.8)  | 261 (12.9)  | 0.03 |
| Chest pain                                                                                  | 552 (26.6)  | 3392 (26.4)  | 0.00 | 537 (26.5)  | 526 (25.9)  | 0.01 |
| Syncope                                                                                     | 205 (9.9)   | 1146 (8.9)   | 0.03 | 196 (9.7)   | 202 (10)    | 0.01 |
| Acute stroke/transient ischemic attack                                                      | 360 (17.4)  | 2040 (15.9)  | 0.04 | 353 (17.4)  | 377 (18.6)  | 0.03 |
| Pulmonary embolism/deep venous thrombosis                                                   | 344 (16.6)  | 2066 (16.1)  | 0.01 | 331 (16.3)  | 340 (16.8)  | 0.01 |
| Other peripheral vascular disease                                                           | 466 (22.5)  | 2600 (20.2)  | 0.05 | 457 (22.5)  | 508 (25)    | 0.06 |
| Cardio-respiratory failure                                                                  | 122 (5.9)   | 772 (6)      | 0.01 | 117 (5.8)   | 119 (5.9)   | 0.00 |
| Chronic obstructive pulmonary disease/asthma                                                | 1021 (49.2) | 6695 (52.1)  | 0.06 | 1006 (49.6) | 1028 (50.7) | 0.02 |
| Pneumonia including aspiration pneumonitis                                                  | 1268 (61.1) | 7985 (62.2)  | 0.02 | 1244 (61.3) | 1231 (60.7) | 0.01 |
| Septicemia/shock                                                                            | 454 (21.9)  | 2631 (20.5)  | 0.03 | 442 (21.8)  | 452 (22.3)  | 0.01 |
| Urinary tract infection and urinary system complaints                                       | 1069 (51.5) | 6556 (51.1)  | 0.01 | 1046 (51.6) | 1024 (50.5) | 0.02 |
| Cellulitis                                                                                  | 322 (15.5)  | 1986 (15.5)  | 0.00 | 316 (15.6)  | 321 (15.8)  | 0.01 |
| Clostridium difficile-associated infection                                                  | 17 (0.8)    | 131 (1)      | 0.02 | 17 (0.8)    | 24 (1.2)    | 0.03 |
| Renal disorders including renal failure and fluid, electrolyte, and acid-base abnormalities | 1513 (73)   | 8862 (69)    | 0.09 | 1476 (72.8) | 1479 (72.9) | 0.00 |
| Anemia                                                                                      | 992 (47.8)  | 5949 (46.3)  | 0.03 | 974 (48)    | 963 (47.5)  | 0.01 |
| Gastrointestinal hemorrhage                                                                 | 228 (11)    | 1407 (11)    | 0.00 | 222 (10.9)  | 205 (10.1)  | 0.03 |
| Diabetes and its complications                                                              | 1167 (56.3) | 6661 (51.9)  | 0.09 | 1135 (56)   | 1166 (57.5) | 0.03 |
| Fibrosis of lung and other chronic lung disorders                                           | 86 (4.1)    | 670 (5.2)    | 0.05 | 85 (4.2)    | 79 (3.9)    | 0.02 |
| Hip fracture                                                                                | 36 (1.7)    | 276 (2.1)    | 0.03 | 36 (1.8)    | 42 (2.1)    | 0.02 |
| Complications of care                                                                       | 331 (16)    | 2101 (16.4)  | 0.01 | 325 (16)    | 307 (15.1)  | 0.02 |
| Other lung disorders including acute, congenital, and unspecified lung abnormalities        | 1064 (51.3) | 6998 (54.5)  | 0.06 | 1046 (51.6) | 1045 (51.5) | 0.00 |
| Primary cancer of the trachea, bronchus, lung, and pleura                                   | 100 (4.8)   | 958 (7.5)    | 0.11 | 100 (4.9)   | 102 (5)     | 0.00 |
| Other infections                                                                            | 1153 (55.6) | 7441 (57.9)  | 0.05 | 1129 (55.7) | 1131 (55.8) | 0.00 |
| Cancer                                                                                      | 597 (28.8)  | 4340 (33.8)  | 0.11 | 589 (29)    | 627 (30.9)  | 0.04 |
| Endocrine/metabolic                                                                         | 1878 (90.5) | 11724 (91.3) | 0.03 | 1836 (90.5) | 1841 (90.8) | 0.01 |
| Liver disease                                                                               | 213 (10.3)  | 1306 (10.2)  | 0.00 | 206 (10.2)  | 184 (9.1)   | 0.04 |
| Gastrointestinal                                                                            | 1454 (70.1) | 9551 (74.4)  | 0.10 | 1423 (70.2) | 1421 (70.1) | 0.00 |
| Musculoskeletal                                                                             | 1698 (81.9) | 10733 (83.6) | 0.05 | 1661 (81.9) | 1672 (82.4) | 0.01 |
| Other hematologic                                                                           | 463 (22.3)  | 3189 (24.8)  | 0.06 | 449 (22.1)  | 474 (23.4)  | 0.03 |
| Cognitive                                                                                   | 501 (24.2)  | 3050 (23.8)  | 0.01 | 493 (24.3)  | 498 (24.6)  | 0.01 |
| Substance abuse                                                                             | 261 (12.6)  | 1638 (12.8)  | 0.01 | 254 (12.5)  | 274 (13.5)  | 0.03 |
| Psychiatric                                                                                 | 974 (47)    | 6364 (49.6)  | 0.05 | 963 (47.5)  | 955 (47.1)  | 0.01 |
| Development disorders                                                                       | 37 (1.8)    | 225 (1.8)    | 0.00 | 37 (1.8)    | 34 (1.7)    | 0.01 |
| Spinal cord                                                                                 | 99 (4.8)    | 689 (5.4)    | 0.03 | 96 (4.7)    | 105 (5.2)   | 0.02 |
| Neuromuscular                                                                               | 1109 (53.5) | 7208 (56.1)  | 0.05 | 1090 (53.7) | 1075 (53)   | 0.01 |

|                                                    |             |              |      |             |             |      |
|----------------------------------------------------|-------------|--------------|------|-------------|-------------|------|
| Non-acute cerebrovascular disease                  | 397 (19.1)  | 2216 (17.3)  | 0.05 | 385 (19)    | 366 (18)    | 0.02 |
| Other pulmonary                                    | 97 (4.7)    | 543 (4.2)    | 0.02 | 94 (4.6)    | 96 (4.7)    | 0.00 |
| Ophthalmologic                                     | 1424 (68.7) | 9176 (71.5)  | 0.06 | 1391 (68.6) | 1407 (69.4) | 0.02 |
| Ear, nose, and throat                              | 1054 (50.8) | 7008 (54.6)  | 0.08 | 1039 (51.2) | 1016 (50.1) | 0.02 |
| Other renal                                        | 582 (28.1)  | 3304 (25.7)  | 0.05 | 565 (27.9)  | 596 (29.4)  | 0.03 |
| Genitourinary                                      | 1385 (66.8) | 8809 (68.6)  | 0.04 | 1354 (66.8) | 1347 (66.4) | 0.01 |
| Other dermatologic                                 | 1010 (48.7) | 6249 (48.7)  | 0.00 | 989 (48.8)  | 1008 (49.7) | 0.02 |
| Injury excluding hip fracture                      | 487 (23.5)  | 3324 (25.9)  | 0.06 | 477 (23.5)  | 470 (23.2)  | 0.01 |
| Symptoms (major and minor) excluding respiratory   | 1116 (53.8) | 7227 (56.3)  | 0.05 | 1092 (53.8) | 1102 (54.3) | 0.01 |
| Miscellaneous surgical and non-surgical procedures | 2033 (98)   | 12655 (98.6) | 0.04 | 1987 (98)   | 1988 (98)   | 0.00 |
| Durable medical equipment                          | 698 (33.7)  | 4396 (34.2)  | 0.01 | 681 (33.6)  | 707 (34.9)  | 0.03 |
| Other                                              | 1746 (84.2) | 10959 (85.3) | 0.03 | 1709 (84.3) | 1716 (84.6) | 0.01 |
| Skin ulcer including decubitus ulcer               | 267 (12.9)  | 1636 (12.7)  | 0.00 | 264 (13)    | 261 (12.9)  | 0.00 |

**Abbreviations:** BP, blood pressure; SMD, standardized mean difference; VISN, Veterans Integrated Service Networks; PDC, proportion of days covered

<sup>a</sup> Patients who were discharged with intensified antihypertensive medications were matched with patients who were discharged without antihypertensive intensifications based on 1:1 propensity score matching without replacement. Matching was performed using a caliper width of 0.2 times the pooled SD of the logit of the propensity scores for the cohort. Balance between the groups was assessed before and after matching by comparing standardized mean differences (SMD) for each variable for which a difference of less than 0.10 was considered to indicate adequate balance.

<sup>b</sup> Missing data: income (n=6), BMI (n=960), outpatient blood pressure (n=425), outpatient pulse (n=534), inpatient blood pressure (n=167), inpatient pulse (n=174), hemoglobin (n=1170), potassium (n=586), sodium (n=534), blood urea nitrogen (n=839), carbon dioxide (n=735), platelets (n=866).

<sup>c</sup> Healthcare services within the national Veterans Affairs Health System are delivered through 18 geographically divided administrative areas called VISNs

<sup>d</sup> Laboratory data collected from day of index hospitalization discharge or during index hospitalization up to 2 days prior to day of discharge

<sup>e</sup> Adherence calculated from electronic pharmacy dispensing data as the proportion of days covered (PDC) for each admission antihypertensive in the year prior to index hospital admission. A threshold of 80% is a commonly used criterion to determine clinically significant nonadherence. To account for patients taking multiple antihypertensives at hospital admission, a composite PDC was calculated as the mean of each individual antihypertensive PDC, as individual antihypertensive PDCs were highly collinear within patients.

<sup>f</sup> All medications classified using VA drug class coding. Combination medications were split into component parts. Topical, inhaled, otic and optic medications were excluded.

<sup>g</sup> Comorbidities include both secondary discharge diagnoses from index hospitalization and preadmission diagnoses from the year preceding index hospitalization.

**eTable 4:** Components of Composite Outcomes Associated with Receiving Antihypertensive Intensifications at Hospital Discharge

|                               | 30 days                    |                             |                          | 365 days                   |                             |                          |
|-------------------------------|----------------------------|-----------------------------|--------------------------|----------------------------|-----------------------------|--------------------------|
|                               | Intensified<br>(N=2028)    | Not Intensified<br>(N=2028) | Hazard Ratio<br>(95% CI) | Intensified<br>(N=2028)    | Not Intensified<br>(N=2028) | Hazard Ratio<br>(95% CI) |
|                               | <i>No. of patients (%)</i> |                             |                          | <i>No. of patients (%)</i> |                             |                          |
| <b>Serious adverse events</b> |                            |                             |                          |                            |                             |                          |
| Acute kidney injury           | 36 (1.8)                   | 26 (1.3)                    | 1.39 (0.84 to 2.30)      | 96 (4.7)                   | 84 (4.1)                    | 1.15 (0.86 to 1.54)      |
| Injurious fall                | 38 (1.9)                   | 28 (1.4)                    | 1.36 (0.83 to 2.21)      | 214 (10.6)                 | 199 (9.8)                   | 1.08 (0.89 to 1.31)      |
| Electrolyte abnormality       | 26 (1.3)                   | 19 (0.9)                    | 1.37 (0.76 to 2.47)      | 110 (5.4)                  | 85 (4.2)                    | 1.30 (0.98 to 1.72)      |
| Syncope                       | 18 (0.9)                   | 9 (0.4)                     | 2.00 (0.90 to 4.45)      | 64 (3.2)                   | 56 (2.8)                    | 1.15 (0.80 to 1.64)      |
| Medication poisoning          | 0 (0.0)                    | 0 (0.0)                     | 1                        | 0 (0.0)                    | 0 (0.0)                     | 1                        |
| <b>Cardiovascular events</b>  |                            |                             |                          |                            |                             |                          |
| Acute myocardial infarction   | 45 (2.2)                   | 48 (2.4)                    | 0.94 (0.62 to 1.41)      | 10 (0.5)                   | 7 (0.4)                     | 1.43 (0.54 to 3.75)      |
| Unstable angina               | 0 (0.0)                    | 0 (0.0)                     | 1.00                     | 0 (0.0)                    | 1                           | 0                        |
| Stroke                        | 16 (0.8)                   | 1 (0.1)                     | 16.0 (2.1 to 120.9)      | 68 (3.4)                   | 58 (2.8)                    | 1.22 (0.86 to 1.74)      |
| Heart failure                 | 46 (2.3)                   | 37 (1.8)                    | 1.25 (0.81 to 1.92)      | 189 (7.6)                  | 154 (9.3)                   | 1.24 (1.00 to 1.53)      |
| Hypertension                  | 0 (0.0)                    | 0 (0.0)                     | 1.00                     | 0 (0.0)                    | 0 (0.0)                     | 1.00                     |

**eTable 5.** Baseline Characteristics Before and After Propensity Score Matching, Well-Controlled Baseline BP subgroup

| Characteristic                                           | Before Propensity Score Matching |                           | SMD   | After Propensity Score Matching |                          | SMD   |
|----------------------------------------------------------|----------------------------------|---------------------------|-------|---------------------------------|--------------------------|-------|
|                                                          | Intensified (N=1,138)            | Not Intensified (N=8,933) |       | Intensified (N=1122)            | Not Intensified (N=1122) |       |
| Age, mean (SD), y                                        | 76.9 (8.4)                       | 76.4 (8.6)                | -0.05 | 76.9 (8.4)                      | 77.1 (8.8)               | 0.02  |
| Female sex, No. (%)                                      | 23 (2)                           | 212 (2.4)                 | 0.02  | 23 (2)                          | 18 (1.6)                 | 0.03  |
| Race/ethnicity, No. (%)                                  |                                  |                           | 0.15  |                                 |                          | 0.02  |
| White                                                    | 827 (72.7)                       | 7069 (79.1)               |       | 815 (72.6)                      | 813 (72.5)               |       |
| Black                                                    | 242 (21.3)                       | 1455 (16.3)               |       | 238 (21.2)                      | 235 (20.9)               |       |
| Hispanic                                                 | 31 (2.7)                         | 159 (1.8)                 |       | 31 (2.8)                        | 34 (3)                   |       |
| Other                                                    | 38 (3.3)                         | 250 (2.8)                 |       | 38 (3.4)                        | 40 (3.6)                 |       |
| Median zip code household income, mean (SD), \$          | 46273 (19739)                    | 47846 (19038)             | 0.08  | 46293 (19755)                   | 46387 (18495)            | 0.00  |
| VISN, No. (%)                                            |                                  |                           | 0.15  |                                 |                          | 0.20  |
| New England Health Care System                           | 49 (4.3)                         | 387 (4.3)                 |       | 49 (4.4)                        | 45 (4)                   |       |
| Healthcare New York/New Jersey                           | 58 (5.1)                         | 554 (6.2)                 |       | 58 (5.2)                        | 61 (5.4)                 |       |
| VISN4 Network                                            | 42 (3.7)                         | 354 (4)                   |       | 42 (3.7)                        | 47 (4.2)                 |       |
| Capitol Healthcare Network                               | 50 (4.4)                         | 323 (3.6)                 |       | 49 (4.4)                        | 42 (3.7)                 |       |
| Mid-Atlantic Health Care Network                         | 65 (5.7)                         | 549 (6.1)                 |       | 65 (5.8)                        | 72 (6.4)                 |       |
| Southeast Network                                        | 61 (5.4)                         | 448 (5)                   |       | 59 (5.3)                        | 69 (6.1)                 |       |
| Sunshine Healthcare Network                              | 119 (10.5)                       | 840 (9.4)                 |       | 115 (10.2)                      | 117 (10.4)               |       |
| MidSouth Healthcare Network                              | 101 (8.9)                        | 642 (7.2)                 |       | 100 (8.9)                       | 84 (7.5)                 |       |
| Healthcare System                                        | 36 (3.2)                         | 230 (2.6)                 |       | 36 (3.2)                        | 24 (2.1)                 |       |
| Great Lakes Healthcare System                            | 90 (7.9)                         | 759 (8.5)                 |       | 88 (7.8)                        | 103 (9.2)                |       |
| Heartland Network                                        | 60 (5.3)                         | 440 (4.9)                 |       | 60 (5.3)                        | 48 (4.3)                 |       |
| South Central VA Healthcare Network                      | 129 (11.3)                       | 1014 (11.4)               |       | 126 (11.2)                      | 136 (12.1)               |       |
| Heart of Texas Healthcare System                         | 39 (3.4)                         | 446 (5)                   |       | 38 (3.4)                        | 62 (5.5)                 |       |
| Southwest Healthcare Network                             | 36 (3.2)                         | 377 (4.2)                 |       | 34 (3)                          | 33 (2.9)                 |       |
| Rocky Mountain Network                                   | 29 (2.5)                         | 223 (2.5)                 |       | 29 (2.6)                        | 37 (3.3)                 |       |
| Northwest Health Network                                 | 39 (3.4)                         | 256 (2.9)                 |       | 39 (3.5)                        | 27 (2.4)                 |       |
| Sierra Pacific Network                                   | 42 (3.7)                         | 349 (3.9)                 |       | 42 (3.7)                        | 36 (3.2)                 |       |
| Desert Pacific Healthcare Network                        | 51 (4.5)                         | 424 (4.7)                 |       | 51 (4.5)                        | 35 (3.1)                 |       |
| Midwest Healthcare Network                               | 42 (3.7)                         | 318 (3.6)                 |       | 42 (3.7)                        | 44 (3.9)                 |       |
| <b>Pre-admission clinical characteristics, mean (SD)</b> |                                  |                           |       |                                 |                          |       |
| Body mass index, kg/m <sup>2</sup>                       | 27.7 (6.4)                       | 27.5 (6.4)                | -0.03 | 27.7 (6.4)                      | 27.6 (6.4)               | -0.01 |
| Pulse, bpm                                               | 74.5 (12.9)                      | 75.4 (12.5)               | 0.07  | 74.5 (12.9)                     | 74.3 (12.2)              | -0.02 |
| Systolic BP, mmHg                                        | 125.4 (10.7)                     | 123.8 (11.1)              | -0.15 | 125.3 (10.7)                    | 124.6 (11.1)             | -0.07 |
| <b>Index hospitalization characteristics</b>             |                                  |                           |       |                                 |                          |       |
| Length of stay, mean (SD), d                             | 6.9 (8.2)                        | 5.5 (7.2)                 | -0.18 | 6.8 (8.2)                       | 7.1 (11.4)               | 0.03  |

|                                                                      |               |               |       |               |               |       |
|----------------------------------------------------------------------|---------------|---------------|-------|---------------|---------------|-------|
| Year of hospitalization, No. (%)                                     |               |               | 0.02  |               |               | 0.06  |
| 2011                                                                 | 421 (37)      | 3287 (36.8)   |       | 417 (37.2)    | 400 (35.7)    |       |
| 2012                                                                 | 382 (33.6)    | 2944 (33)     |       | 373 (33.2)    | 358 (31.9)    |       |
| 2013                                                                 | 335 (29.4)    | 2702 (30.2)   |       | 332 (29.6)    | 364 (32.4)    |       |
| <b>Inpatient SBP, No (%)</b>                                         |               |               |       |               |               |       |
| ≥3 reading < 90 mmHg                                                 | 37 (3.3)      | 361 (4)       | 0.04  | 37 (3.3)      | 34 (3)        | 0.02  |
| ≥3 readings ≥160 mmHg                                                | 329 (28.9)    | 1039 (11.6)   | 0.44  | 324 (28.9)    | 340 (30.3)    | 0.03  |
| ≥3 readings ≥180 mmHg                                                | 113 (9.9)     | 168 (1.9)     | 0.35  | 102 (9.1)     | 96 (8.6)      | 0.02  |
| <b>Inpatient pulse, No (%)</b>                                       |               |               |       |               |               |       |
| ≥3 readings < 60 bpm                                                 | 235 (20.7)    | 1350 (15.1)   | 0.14  | 229 (20.4)    | 232 (20.7)    | 0.01  |
| ≥3 readings ≥100 bpm                                                 | 56 (4.9)      | 538 (6)       | 0.05  | 56 (5)        | 52 (4.6)      | 0.02  |
| <b>Discharge diagnosis, No (%)</b>                                   |               |               | 0.02  |               |               | 0.01  |
| Pneumonia                                                            | 584 (51.3)    | 4646 (52)     |       | 578 (51.5)    | 571 (50.9)    |       |
| Urinary tract infection                                              | 430 (37.8)    | 3377 (37.8)   |       | 424 (37.8)    | 428 (38.1)    |       |
| Venous thromboembolism                                               | 124 (10.9)    | 910 (10.2)    |       | 120 (10.7)    | 123 (11)      |       |
| <b>Index hospital discharge laboratory values, mean (SD)</b>         |               |               |       |               |               |       |
| Hemoglobin, g/dL                                                     | 11.5 (1.8)    | 11.4 (1.8)    | -0.05 | 11.5 (1.8)    | 11.5 (1.8)    | -0.04 |
| Platelets, k/mm <sup>3</sup>                                         | 231.5 (102.4) | 231.4 (101.9) | 0.00  | 232.4 (102.5) | 234.2 (100.9) | 0.02  |
| Sodium, mEQ/L                                                        | 138.2 (3.6)   | 138.2 (3.5)   | 0.01  | 138.2 (3.6)   | 138.3 (3.6)   | 0.04  |
| Potassium, mEQ/L                                                     | 4.1 (0.5)     | 4.1 (0.5)     | -0.07 | 4.1 (0.5)     | 4.1 (0.5)     | 0.01  |
| Blood urea nitrogen, mg/dL                                           | 22.9 (13.4)   | 21 (12.3)     | -0.15 | 22.8 (13.2)   | 23.3 (13.7)   | 0.04  |
| Carbon dioxide, mEQ/L                                                | 26.4 (4.2)    | 26.1 (3.9)    | -0.08 | 26.4 (4.2)    | 26.4 (3.9)    | 0.00  |
| Estimated glomerular filtration rate, mL/min per 1.73 m <sup>2</sup> | 68.9 (31.9)   | 72.7 (32)     | 0.12  | 69.1 (32)     | 67.7 (32.2)   | -0.04 |
| <b>Health Care Use, No. (%)</b>                                      |               |               |       |               |               |       |
| Medicare utilization in prior year                                   | 315 (27.7)    | 2530 (28.3)   | 0.01  | 310 (27.6)    | 306 (27.3)    | 0.01  |
| No. ED visits in the year preceding index hospitalization            |               |               | 0.08  |               |               | 0.04  |
| 0                                                                    | 487 (42.8)    | 3743 (41.9)   |       | 477 (42.5)    | 483 (43)      |       |
| 1                                                                    | 295 (25.9)    | 2186 (24.5)   |       | 292 (26)      | 273 (24.3)    |       |
| 2                                                                    | 164 (14.4)    | 1228 (13.7)   |       | 162 (14.4)    | 173 (15.4)    |       |
| ≥3                                                                   | 192 (16.9)    | 1776 (19.9)   |       | 191 (17)      | 193 (17.2)    |       |
| No. hospitalizations in the year preceding index hospitalization     |               |               | 0.08  |               |               | 0.03  |
| 0                                                                    | 416 (36.6)    | 2940 (32.9)   |       | 408 (36.4)    | 407 (36.3)    |       |
| 1                                                                    | 245 (21.5)    | 2010 (22.5)   |       | 242 (21.6)    | 249 (22.2)    |       |
| 2                                                                    | 156 (13.7)    | 1362 (15.2)   |       | 152 (13.5)    | 159 (14.2)    |       |
| ≥3                                                                   | 321 (28.2)    | 2621 (29.3)   |       | 320 (28.5)    | 307 (27.4)    |       |
| Polypharmacy prior to hospitalization                                | 559 (49.1)    | 4404 (49.3)   | 0.00  | 550 (49)      | 577 (51.4)    | 0.05  |
| Serious fall                                                         | 55 (4.8)      | 404 (4.5)     | 0.01  | 53 (4.7)      | 65 (5.8)      | 0.05  |
| <b>Antihypertensive use patterns, No (%)</b>                         |               |               |       |               |               |       |

|                                                                             |            |             |      |            |            |      |
|-----------------------------------------------------------------------------|------------|-------------|------|------------|------------|------|
| Admission antihypertensive use and adherence                                |            |             | 0.19 |            |            | 0.07 |
| 0 antihypertensives                                                         | 300 (26.4) | 2235 (25)   |      | 292 (26)   | 283 (25.2) |      |
| 1 antihypertensive, PDC $\leq$ 80%                                          | 149 (13.1) | 878 (9.8)   |      | 146 (13)   | 138 (12.3) |      |
| 1 antihypertensive, PDC $>$ 80%                                             | 178 (15.6) | 1684 (18.9) |      | 178 (15.9) | 192 (17.1) |      |
| 2 antihypertensives, PDC $\leq$ 80%                                         | 116 (10.2) | 659 (7.4)   |      | 112 (10)   | 120 (10.7) |      |
| 2 antihypertensive, PDC $>$ 80%                                             | 195 (17.1) | 1692 (18.9) |      | 195 (17.4) | 184 (16.4) |      |
| $\geq$ 3 antihypertensive, PDC $\leq$ 80%                                   | 58 (5.1)   | 384 (4.3)   |      | 57 (5.1)   | 49 (4.4)   |      |
| $\geq$ 3 antihypertensive, PDC $>$ 80%                                      | 142 (12.5) | 1401 (15.7) |      | 142 (12.7) | 156 (13.9) |      |
| Antihypertensive used year prior to hospital admission                      |            |             | 0.19 |            |            | 0.04 |
| 0                                                                           | 131 (11.5) | 1512 (16.9) |      | 131 (11.7) | 128 (11.4) |      |
| 1                                                                           | 285 (25)   | 2461 (27.5) |      | 285 (25.4) | 290 (25.8) |      |
| 2                                                                           | 356 (31.3) | 2527 (28.3) |      | 352 (31.4) | 340 (30.3) |      |
| 3                                                                           | 221 (19.4) | 1540 (17.2) |      | 215 (19.2) | 224 (20)   |      |
| 4                                                                           | 103 (9.1)  | 632 (7.1)   |      | 100 (8.9)  | 95 (8.5)   |      |
| 5                                                                           | 42 (3.7)   | 261 (2.9)   |      | 39 (3.5)   | 45 (4)     |      |
| <b>Cardiovascular medication classes used at hospital admission, No (%)</b> |            |             |      |            |            |      |
| Angiotensin-converting enzyme inhibitors                                    | 394 (34.6) | 3028 (33.9) | 0.02 | 388 (34.6) | 383 (34.1) | 0.01 |
| Angiotensin II inhibitors                                                   | 76 (6.7)   | 723 (8.1)   | 0.05 | 76 (6.8)   | 71 (6.3)   | 0.02 |
| Beta blockers                                                               | 466 (40.9) | 3754 (42)   | 0.02 | 459 (40.9) | 452 (40.3) | 0.01 |
| Calcium channel blockers                                                    | 277 (24.3) | 2362 (26.4) | 0.05 | 275 (24.5) | 288 (25.7) | 0.03 |
| Non-loop diuretics                                                          | 185 (16.3) | 1633 (18.3) | 0.05 | 184 (16.4) | 189 (16.8) | 0.01 |
| Loop diuretics                                                              | 244 (21.4) | 1817 (20.3) | 0.03 | 238 (21.2) | 232 (20.7) | 0.01 |
| Other antihypertensives                                                     | 99 (8.7)   | 600 (6.7)   | 0.07 | 97 (8.6)   | 95 (8.5)   | 0.01 |
| Alpha blockers                                                              | 366 (32.2) | 2941 (32.9) | 0.02 | 361 (32.2) | 350 (31.2) | 0.02 |
| Anti-lipemic agents                                                         | 579 (50.9) | 4885 (54.7) | 0.08 | 572 (51)   | 565 (50.4) | 0.01 |
| Antianginals                                                                | 140 (12.3) | 919 (10.3)  | 0.06 | 137 (12.2) | 136 (12.1) | 0.00 |
| Anti-arrhythmics                                                            | 13 (1.1)   | 87 (1)      | 0.02 | 13 (1.2)   | 9 (0.8)    | 0.04 |
| Digitalis                                                                   | 25 (2.2)   | 187 (2.1)   | 0.01 | 24 (2.1)   | 25 (2.2)   | 0.01 |
| <b>Other medication classes used at hospital admission, No. (%)</b>         |            |             |      |            |            |      |
| Anti-histamines                                                             | 145 (12.7) | 1334 (14.9) | 0.06 | 145 (12.9) | 141 (12.6) | 0.01 |
| Anti-microbials                                                             | 49 (4.3)   | 458 (5.1)   | 0.04 | 49 (4.4)   | 46 (4.1)   | 0.01 |
| Anti-neoplastics                                                            | 32 (2.8)   | 321 (3.6)   | 0.04 | 31 (2.8)   | 41 (3.7)   | 0.05 |
| Autonomic medications                                                       | 26 (2.3)   | 222 (2.5)   | 0.01 | 25 (2.2)   | 28 (2.5)   | 0.02 |
| Anticoagulants                                                              | 70 (6.2)   | 470 (5.3)   | 0.04 | 70 (6.2)   | 74 (6.6)   | 0.01 |
| Platelet aggregation inhibitors (including aspirin)                         | 124 (10.9) | 854 (9.6)   | 0.04 | 122 (10.9) | 108 (9.6)  | 0.04 |
| Other central nervous system medications                                    | 134 (11.8) | 1062 (11.9) | 0.00 | 134 (11.9) | 140 (12.5) | 0.02 |
| Non-opioid analgesics                                                       | 321 (28.2) | 2657 (29.7) | 0.03 | 319 (28.4) | 298 (26.6) | 0.04 |
| Opioid analgesics                                                           | 271 (23.8) | 2097 (23.5) | 0.01 | 266 (23.7) | 271 (24.2) | 0.01 |

|                                                                                             |            |             |      |            |            |      |
|---------------------------------------------------------------------------------------------|------------|-------------|------|------------|------------|------|
| Sedatives and hypnotics                                                                     | 142 (12.5) | 1244 (13.9) | 0.04 | 140 (12.5) | 132 (11.8) | 0.02 |
| Anti-convulsants                                                                            | 201 (17.7) | 1820 (20.4) | 0.07 | 200 (17.8) | 221 (19.7) | 0.05 |
| Anti-depressants                                                                            | 326 (28.6) | 2760 (30.9) | 0.05 | 322 (28.7) | 334 (29.8) | 0.02 |
| Anti-psychotics                                                                             | 72 (6.3)   | 609 (6.8)   | 0.02 | 71 (6.3)   | 84 (7.5)   | 0.05 |
| Gastrointestinal medications                                                                | 599 (52.6) | 5022 (56.2) | 0.07 | 592 (52.8) | 603 (53.7) | 0.02 |
| Genitourinary medications                                                                   | 111 (9.8)  | 956 (10.7)  | 0.03 | 111 (9.9)  | 116 (10.3) | 0.01 |
| Hormones                                                                                    | 333 (29.3) | 2997 (33.5) | 0.09 | 331 (29.5) | 307 (27.4) | 0.05 |
| Insulin                                                                                     | 239 (21)   | 1875 (21)   | 0.00 | 237 (21.1) | 234 (20.9) | 0.01 |
| Non-insulin hypoglycemics                                                                   | 183 (16.1) | 1157 (13)   | 0.09 | 181 (16.1) | 180 (16)   | 0.00 |
| Musculoskeletal medications                                                                 | 222 (19.5) | 1809 (20.3) | 0.02 | 217 (19.3) | 225 (20.1) | 0.02 |
| Systemic decongestants and antitussives                                                     | 64 (5.6)   | 618 (6.9)   | 0.05 | 64 (5.7)   | 69 (6.1)   | 0.02 |
| <b>Comorbidities, No. (%)</b>                                                               |            |             |      |            |            |      |
| Heart failure                                                                               | 396 (34.8) | 2289 (25.6) | 0.20 | 385 (34.3) | 394 (35.1) | 0.02 |
| Acute myocardial infarction                                                                 | 64 (5.6)   | 439 (4.9)   | 0.03 | 63 (5.6)   | 46 (4.1)   | 0.07 |
| Unstable angina and other acute ischemic heart disease                                      | 51 (4.5)   | 400 (4.5)   | 0.00 | 51 (4.5)   | 59 (5.3)   | 0.03 |
| Chronic angina and coronary artery disease                                                  | 514 (45.2) | 3703 (41.5) | 0.08 | 504 (44.9) | 510 (45.5) | 0.01 |
| Valvular/rheumatic heart disease                                                            | 145 (12.7) | 1045 (11.7) | 0.03 | 145 (12.9) | 128 (11.4) | 0.05 |
| Other cardiac disease including congenital heart and hypertensive disease                   | 745 (65.5) | 5418 (60.7) | 0.10 | 732 (65.2) | 756 (67.4) | 0.05 |
| Arrhythmias and conduction disorders                                                        | 392 (34.4) | 3003 (33.6) | 0.02 | 385 (34.3) | 390 (34.8) | 0.01 |
| Pleural effusion/pneumothorax                                                               | 147 (12.9) | 1203 (13.5) | 0.02 | 143 (12.7) | 143 (12.7) | 0.00 |
| Chest pain                                                                                  | 309 (27.2) | 2398 (26.8) | 0.01 | 303 (27)   | 291 (25.9) | 0.02 |
| Syncope                                                                                     | 126 (11.1) | 792 (8.9)   | 0.07 | 122 (10.9) | 95 (8.5)   | 0.08 |
| Acute stroke/transient ischemic attack                                                      | 206 (18.1) | 1420 (15.9) | 0.06 | 204 (18.2) | 194 (17.3) | 0.02 |
| Pulmonary embolism/deep venous thrombosis                                                   | 194 (17)   | 1489 (16.7) | 0.01 | 190 (16.9) | 203 (18.1) | 0.03 |
| Other peripheral vascular disease                                                           | 249 (21.9) | 1815 (20.3) | 0.04 | 248 (22.1) | 253 (22.5) | 0.01 |
| Cardio-respiratory failure                                                                  | 79 (6.9)   | 600 (6.7)   | 0.01 | 77 (6.9)   | 75 (6.7)   | 0.01 |
| Chronic obstructive pulmonary disease/asthma                                                | 593 (52.1) | 4792 (53.6) | 0.03 | 585 (52.1) | 582 (51.9) | 0.01 |
| Pneumonia including aspiration pneumonitis                                                  | 706 (62)   | 5588 (62.6) | 0.01 | 699 (62.3) | 698 (62.2) | 0.00 |
| Septicemia/shock                                                                            | 267 (23.5) | 1896 (21.2) | 0.05 | 259 (23.1) | 274 (24.4) | 0.03 |
| Urinary tract infection and urinary system complaints                                       | 591 (51.9) | 4581 (51.3) | 0.01 | 584 (52)   | 587 (52.3) | 0.01 |
| Cellulitis                                                                                  | 185 (16.3) | 1396 (15.6) | 0.02 | 184 (16.4) | 201 (17.9) | 0.04 |
| Clostridium difficile-associated infection                                                  | 10 (0.9)   | 93 (1)      | 0.02 | 10 (0.9)   | 14 (1.2)   | 0.03 |
| Renal disorders including renal failure and fluid, electrolyte, and acid-base abnormalities | 829 (72.8) | 6119 (68.5) | 0.10 | 816 (72.7) | 825 (73.5) | 0.02 |
| Anemia                                                                                      | 526 (46.2) | 4199 (47)   | 0.02 | 520 (46.3) | 538 (48)   | 0.03 |
| Gastrointestinal hemorrhage                                                                 | 122 (10.7) | 994 (11.1)  | 0.01 | 120 (10.7) | 106 (9.4)  | 0.04 |

|                                                                                      |             |             |      |             |             |      |
|--------------------------------------------------------------------------------------|-------------|-------------|------|-------------|-------------|------|
| Diabetes and its complications                                                       | 621 (54.6)  | 4608 (51.6) | 0.06 | 612 (54.5)  | 607 (54.1)  | 0.01 |
| Fibrosis of lung and other chronic lung disorders                                    | 51 (4.5)    | 487 (5.5)   | 0.04 | 51 (4.5)    | 50 (4.5)    | 0.00 |
| Hip fracture                                                                         | 19 (1.7)    | 200 (2.2)   | 0.04 | 19 (1.7)    | 16 (1.4)    | 0.02 |
| Complications of care                                                                | 178 (15.6)  | 1522 (17)   | 0.04 | 177 (15.8)  | 170 (15.2)  | 0.02 |
| Other lung disorders including acute, congenital, and unspecified lung abnormalities | 579 (50.9)  | 4924 (55.1) | 0.09 | 572 (51)    | 558 (49.7)  | 0.02 |
| Primary cancer of the trachea, bronchus, lung, and pleura                            | 59 (5.2)    | 727 (8.1)   | 0.12 | 59 (5.3)    | 59 (5.3)    | 0.00 |
| Other infections                                                                     | 636 (55.9)  | 5257 (58.8) | 0.06 | 630 (56.1)  | 646 (57.6)  | 0.03 |
| Cancer                                                                               | 324 (28.5)  | 3010 (33.7) | 0.11 | 321 (28.6)  | 349 (31.1)  | 0.05 |
| Endocrine/metabolic                                                                  | 1038 (91.2) | 8206 (91.9) | 0.02 | 1024 (91.3) | 1006 (89.7) | 0.05 |
| Liver disease                                                                        | 127 (11.2)  | 935 (10.5)  | 0.02 | 126 (11.2)  | 127 (11.3)  | 0.00 |
| Digestive (Gastrointestinal)                                                         | 803 (70.6)  | 6701 (75)   | 0.10 | 792 (70.6)  | 798 (71.1)  | 0.01 |
| Musculoskeletal                                                                      | 930 (81.7)  | 7506 (84)   | 0.06 | 915 (81.6)  | 912 (81.3)  | 0.01 |
| Other hematologic                                                                    | 246 (21.6)  | 2316 (25.9) | 0.10 | 244 (21.7)  | 232 (20.7)  | 0.03 |
| Cognitive                                                                            | 274 (24.1)  | 2169 (24.3) | 0.00 | 273 (24.3)  | 283 (25.2)  | 0.02 |
| Substance abuse                                                                      | 146 (12.8)  | 1129 (12.6) | 0.01 | 143 (12.7)  | 161 (14.3)  | 0.05 |
| Psychiatric                                                                          | 557 (48.9)  | 4550 (50.9) | 0.04 | 552 (49.2)  | 571 (50.9)  | 0.03 |
| Development disorders                                                                | 20 (1.8)    | 160 (1.8)   | 0.00 | 20 (1.8)    | 14 (1.2)    | 0.04 |
| Spinal cord                                                                          | 63 (5.5)    | 508 (5.7)   | 0.01 | 62 (5.5)    | 58 (5.2)    | 0.02 |
| Neuromuscular                                                                        | 615 (54)    | 5013 (56.1) | 0.04 | 611 (54.5)  | 593 (52.9)  | 0.03 |
| Non-acute cerebrovascular disease                                                    | 230 (20.2)  | 1523 (17)   | 0.08 | 227 (20.2)  | 222 (19.8)  | 0.01 |
| Other pulmonary                                                                      | 54 (4.7)    | 375 (4.2)   | 0.03 | 53 (4.7)    | 47 (4.2)    | 0.03 |
| Ophthalmologic                                                                       | 772 (67.8)  | 6375 (71.4) | 0.08 | 763 (68)    | 766 (68.3)  | 0.01 |
| Ear, nose, and throat                                                                | 581 (51.1)  | 4879 (54.6) | 0.07 | 576 (51.3)  | 590 (52.6)  | 0.02 |
| Other renal                                                                          | 308 (27.1)  | 2261 (25.3) | 0.04 | 302 (26.9)  | 321 (28.6)  | 0.04 |
| Genitourinary                                                                        | 759 (66.7)  | 6138 (68.7) | 0.04 | 749 (66.8)  | 765 (68.2)  | 0.03 |
| Other dermatologic                                                                   | 577 (50.7)  | 4340 (48.6) | 0.04 | 566 (50.4)  | 582 (51.9)  | 0.03 |
| Injury excluding hip fracture                                                        | 266 (23.4)  | 2368 (26.5) | 0.07 | 264 (23.5)  | 262 (23.4)  | 0.00 |
| Symptoms (major and minor) excluding respiratory                                     | 613 (53.9)  | 5075 (56.8) | 0.06 | 605 (53.9)  | 603 (53.7)  | 0.00 |
| Miscellaneous surgical and non-surgical procedures                                   | 1118 (98.2) | 8819 (98.7) | 0.04 | 1102 (98.2) | 1102 (98.2) | 0.00 |
| Durable medical equipment                                                            | 391 (34.4)  | 3119 (34.9) | 0.01 | 385 (34.3)  | 383 (34.1)  | 0.00 |
| Other                                                                                | 973 (85.5)  | 7634 (85.5) | 0.00 | 958 (85.4)  | 956 (85.2)  | 0.01 |
| Skin ulcer including decubitus ulcer                                                 | 153 (13.4)  | 1196 (13.4) | 0.00 | 151 (13.5)  | 144 (12.8)  | 0.02 |

**Abbreviations:** BP, blood pressure; SMD, standardized mean difference; VISN, Veterans Integrated Service Networks; PDC, proportion of days covered



**eTable 6.** Baseline Characteristics Before and After Propensity Score Matching, Elevated Baseline BP subgroup

|                                                          | Before Propensity Score Matching |                           |       | After Propensity Score Matching |                         |       |
|----------------------------------------------------------|----------------------------------|---------------------------|-------|---------------------------------|-------------------------|-------|
|                                                          | Intensified (N=936)              | Not intensified (N=3,908) | SMD   | Intensified (N=878)             | Not intensified (N=878) | SMD   |
| <b>Characteristic</b>                                    |                                  |                           |       |                                 |                         |       |
| Age, mean (SD), y                                        | 76.6 (8.2)                       | 76.8 (8.6)                | 0.03  | 76.7 (8.3)                      | 76.7 (8.6)              | 0.01  |
| Female sex, No. (%)                                      | 29 (3.1)                         | 114 (2.9)                 | 0.01  | 28 (3.2)                        | 27 (3.1)                | 0.01  |
| Race/ethnicity, No. (%)                                  |                                  |                           | 0.24  |                                 |                         | 0.04  |
| White                                                    | 623 (66.6)                       | 2967 (75.9)               |       | 603 (68.7)                      | 598 (68.1)              |       |
| Black                                                    | 265 (28.3)                       | 737 (18.9)                |       | 229 (26.1)                      | 236 (26.9)              |       |
| Hispanic                                                 | 24 (2.6)                         | 63 (1.6)                  |       | 22 (2.5)                        | 24 (2.7)                |       |
| Other                                                    | 24 (2.6)                         | 141 (3.6)                 |       | 24 (2.7)                        | 20 (2.3)                |       |
| Median zip code household income, mean (SD), \$          | 45557 (20203)                    | 46949 (18698)             | 0.07  | 45642 (20070)                   | 45662 (17788)           | 0.00  |
| VISN, No. (%)                                            |                                  |                           | 0.17  |                                 |                         | 0.23  |
| New England Health Care System                           | 32 (3.4)                         | 162 (4.1)                 |       | 27 (3.1)                        | 38 (4.3)                |       |
| Healthcare New York/New Jersey                           | 46 (4.9)                         | 249 (6.4)                 |       | 45 (5.1)                        | 50 (5.7)                |       |
| VISN4 Network                                            | 31 (3.3)                         | 159 (4.1)                 |       | 30 (3.4)                        | 41 (4.7)                |       |
| Capitol Healthcare Network                               | 37 (4)                           | 152 (3.9)                 |       | 36 (4.1)                        | 26 (3)                  |       |
| Mid-Atlantic Health Care Network                         | 65 (6.9)                         | 239 (6.1)                 |       | 61 (6.9)                        | 50 (5.7)                |       |
| Southeast Network                                        | 37 (4)                           | 174 (4.5)                 |       | 37 (4.2)                        | 39 (4.4)                |       |
| Sunshine Healthcare Network                              | 95 (10.1)                        | 394 (10.1)                |       | 88 (10)                         | 95 (10.8)               |       |
| MidSouth Healthcare Network                              | 54 (5.8)                         | 275 (7)                   |       | 50 (5.7)                        | 62 (7.1)                |       |
| Healthcare System                                        | 31 (3.3)                         | 106 (2.7)                 |       | 29 (3.3)                        | 25 (2.8)                |       |
| Great Lakes Healthcare System                            | 85 (9.1)                         | 348 (8.9)                 |       | 74 (8.4)                        | 67 (7.6)                |       |
| Heartland Network                                        | 47 (5)                           | 182 (4.7)                 |       | 45 (5.1)                        | 44 (5)                  |       |
| South Central VA Healthcare Network                      | 116 (12.4)                       | 420 (10.7)                |       | 111 (12.6)                      | 93 (10.6)               |       |
| Heart of Texas Healthcare System                         | 39 (4.2)                         | 189 (4.8)                 |       | 34 (3.9)                        | 44 (5)                  |       |
| Southwest Healthcare Network                             | 39 (4.2)                         | 193 (4.9)                 |       | 37 (4.2)                        | 56 (6.4)                |       |
| Rocky Mountain Network                                   | 19 (2)                           | 98 (2.5)                  |       | 18 (2.1)                        | 21 (2.4)                |       |
| Northwest Health Network                                 | 26 (2.8)                         | 112 (2.9)                 |       | 24 (2.7)                        | 30 (3.4)                |       |
| Sierra Pacific Network                                   | 50 (5.3)                         | 145 (3.7)                 |       | 47 (5.4)                        | 28 (3.2)                |       |
| Desert Pacific Healthcare Network                        | 46 (4.9)                         | 187 (4.8)                 |       | 46 (5.2)                        | 38 (4.3)                |       |
| Midwest Healthcare Network                               | 41 (4.4)                         | 124 (3.2)                 |       | 39 (4.4)                        | 31 (3.5)                |       |
| <b>Pre-admission clinical characteristics, mean (SD)</b> |                                  |                           |       |                                 |                         |       |
| Body mass index, kg/m <sup>2</sup>                       | 28.3 (7.1)                       | 28 (6.5)                  | -0.03 | 28.3 (7.2)                      | 28 (6.7)                | -0.05 |
| Pulse, bpm                                               | 72.6 (12.3)                      | 72.9 (12.2)               | 0.02  | 72.5 (12.3)                     | 72.5 (12)               | -0.01 |
| Systolic BP, mmHg                                        | 154.6 (13.8)                     | 151.9 (11.5)              | -0.21 | 154.3 (13.5)                    | 154.1 (13.2)            | -0.01 |
| <b>Index hospitalization characteristics</b>             |                                  |                           |       |                                 |                         |       |
| Length of stay, mean (SD), d                             | 6.6 (6)                          | 5.1 (5.5)                 | -0.26 | 6.5 (5.8)                       | 6.8 (8.9)               | 0.04  |

|                                                                         |             |               |       |               |             |       |
|-------------------------------------------------------------------------|-------------|---------------|-------|---------------|-------------|-------|
| Year of hospitalization, No. (%)                                        |             |               | 0.07  |               |             | 0.07  |
| 2011                                                                    | 366 (39.1)  | 1473 (37.7)   |       | 340 (38.7)    | 328 (37.4)  |       |
| 2012                                                                    | 304 (32.5)  | 1204 (30.8)   |       | 289 (32.9)    | 272 (31)    |       |
| 2013                                                                    | 266 (28.4)  | 1231 (31.5)   |       | 249 (28.4)    | 278 (31.7)  |       |
| <b>Inpatient SBP, No (%)</b>                                            |             |               |       |               |             |       |
| ≥3 reading < 90 mmHg                                                    | 8 (0.9)     | 58 (1.5)      | 0.06  | 8 (0.9)       | 11 (1.3)    |       |
| ≥3 readings ≥160 mmHg                                                   | 390 (41.7)  | 1002 (25.6)   | 0.34  | 381 (43.4)    | 393 (44.8)  |       |
| ≥3 readings ≥180 mmHg                                                   | 236 (25.5)  | 260 (6.7)     | 0.52  | 187 (21.3)    | 188 (21.4)  |       |
| <b>Inpatient pulse, No (%)</b>                                          |             |               |       |               |             |       |
| ≥3 readings < 60 bpm                                                    | 229 (24.5)  | 723 (18.5)    | 0.15  | 209 (23.8)    | 233 (26.5)  | 0.06  |
| ≥3 readings ≥100 bpm                                                    | 40 (4.3)    | 205 (5.2)     | 0.05  | 40 (4.6)      | 31 (3.5)    | 0.05  |
| <b>Discharge diagnosis, No (%)</b>                                      |             |               | 0.07  |               |             | 0.05  |
| Pneumonia                                                               | 461 (49.3)  | 2035 (52.1)   |       | 433 (49.3)    | 443 (50.5)  |       |
| Urinary tract infection                                                 | 360 (38.5)  | 1472 (37.7)   |       | 338 (38.5)    | 317 (36.1)  |       |
| Venous thromboembolism                                                  | 115 (12.3)  | 401 (10.3)    |       | 107 (12.2)    | 118 (13.4)  |       |
| <b>Index hospital discharge laboratory values, mean (SD)</b>            |             |               |       |               |             |       |
| Hemoglobin, g/dL                                                        | 11.5 (1.9)  | 11.5 (1.8)    | 0.04  | 11.5 (1.9)    | 11.5 (1.8)  | 0.00  |
| Platelets, k/mm <sup>3</sup>                                            | 237.5 (102) | 232.7 (100.4) | -0.05 | 237.1 (102.7) | 241 (105.5) | 0.04  |
| Sodium, mEQ/L                                                           | 138.2 (3.5) | 138.1 (3.6)   | -0.03 | 138.2 (3.5)   | 138.1 (3.8) | -0.01 |
| Potassium, mEQ/L                                                        | 4.1 (0.5)   | 4.1 (0.5)     | -0.05 | 4.1 (0.5)     | 4.1 (0.5)   | 0.00  |
| Blood urea nitrogen, mg/dL                                              | 25.1 (16.9) | 22.5 (13.5)   | -0.17 | 24.3 (15.7)   | 24.8 (15.7) | 0.03  |
| Carbon dioxide, mEQ/L                                                   | 26.2 (4.1)  | 25.8 (3.8)    | -0.12 | 26.2 (4.1)    | 26.2 (4)    | 0.01  |
| Estimated glomerular filtration rate, mL/min per 1.73 m <sup>2</sup>    | 63 (31.9)   | 67.8 (31)     | 0.15  | 64.1 (31.7)   | 64.1 (32.1) | 0.00  |
| <b>Health Care Use, No. (%)</b>                                         |             |               |       |               |             | 0.00  |
| Medicare utilization in prior year                                      | 250 (26.7)  | 1073 (27.5)   | 0.02  | 237 (27)      | 234 (26.7)  | 0.01  |
| <b>No. ED visits in the year preceding index hospitalization</b>        |             |               | 0.05  |               |             | 0.03  |
| 0                                                                       | 366 (39.1)  | 1592 (40.7)   |       | 344 (39.2)    | 333 (37.9)  |       |
| 1                                                                       | 241 (25.7)  | 973 (24.9)    |       | 226 (25.7)    | 223 (25.4)  |       |
| 2                                                                       | 129 (13.8)  | 564 (14.4)    |       | 119 (13.6)    | 126 (14.4)  |       |
| ≥3                                                                      | 200 (21.4)  | 779 (19.9)    |       | 189 (21.5)    | 196 (22.3)  |       |
| <b>No. hospitalizations in the year preceding index hospitalization</b> |             |               | 0.08  |               |             | 0.04  |
| 0                                                                       | 328 (35)    | 1390 (35.6)   |       | 303 (34.5)    | 294 (33.5)  |       |
| 1                                                                       | 204 (21.8)  | 936 (24)      |       | 194 (22.1)    | 203 (23.1)  |       |
| 2                                                                       | 154 (16.5)  | 552 (14.1)    |       | 146 (16.6)    | 138 (15.7)  |       |
| ≥3                                                                      | 250 (26.7)  | 1030 (26.4)   |       | 235 (26.8)    | 243 (27.7)  |       |
| Polypharmacy prior to hospitalization                                   | 465 (49.7)  | 1873 (47.9)   | 0.04  | 442 (50.3)    | 422 (48.1)  | 0.05  |
| Serious fall                                                            | 39 (4.2)    | 165 (4.2)     | 0.00  | 38 (4.3)      | 42 (4.8)    | 0.02  |
| <b>Antihypertensive use patterns, No (%)</b>                            |             |               |       |               |             |       |
| <b>Admission antihypertensive use and adherence</b>                     |             |               | 0.17  |               |             | 0.07  |
| 0 antihypertensives                                                     | 226 (24.1)  | 842 (21.5)    |       | 205 (23.3)    | 219 (24.9)  |       |
| 1 antihypertensive, PDC≤80%                                             | 121 (12.9)  | 411 (10.5)    |       | 112 (12.8)    | 119 (13.6)  |       |
| 1 antihypertensive, PDC>80%                                             | 104 (11.1)  | 571 (14.6)    |       | 102 (11.6)    | 91 (10.4)   |       |

|                                                                             |            |             |      |            |            |      |
|-----------------------------------------------------------------------------|------------|-------------|------|------------|------------|------|
| 2 antihypertensives, PDC $\leq$ 80%                                         | 105 (11.2) | 373 (9.5)   |      | 97 (11)    | 92 (10.5)  |      |
| 2 antihypertensive, PDC>80%                                                 | 132 (14.1) | 686 (17.6)  |      | 127 (14.5) | 119 (13.6) |      |
| $\geq$ 3 antihypertensive, PDC $\leq$ 80%                                   | 80 (8.5)   | 284 (7.3)   |      | 76 (8.7)   | 81 (9.2)   |      |
| $\geq$ 3 antihypertensive, PDC>80%                                          | 168 (17.9) | 741 (19)    |      | 159 (18.1) | 157 (17.9) |      |
| Antihypertensive used year prior to hospital admission                      |            |             | 0.19 |            |            | 0.05 |
| 0                                                                           | 101 (10.8) | 559 (14.3)  |      | 100 (11.4) | 104 (11.8) |      |
| 1                                                                           | 175 (18.7) | 863 (22.1)  |      | 166 (18.9) | 167 (19)   |      |
| 2                                                                           | 248 (26.5) | 1050 (26.9) |      | 229 (26.1) | 225 (25.6) |      |
| 3                                                                           | 197 (21)   | 780 (20)    |      | 188 (21.4) | 201 (22.9) |      |
| 4                                                                           | 139 (14.9) | 422 (10.8)  |      | 124 (14.1) | 114 (13)   |      |
| 5                                                                           | 76 (8.1)   | 234 (6)     |      | 71 (8.1)   | 67 (7.6)   |      |
| <b>Cardiovascular medication classes used at hospital admission, No (%)</b> |            |             |      |            |            |      |
| Angiotensin-converting enzyme inhibitors                                    | 314 (33.5) | 1283 (32.8) | 0.02 | 294 (33.5) | 305 (34.7) | 0.03 |
| Angiotensin II inhibitors                                                   | 99 (10.6)  | 398 (10.2)  | 0.01 | 94 (10.7)  | 88 (10)    | 0.02 |
| Beta blockers                                                               | 417 (44.6) | 1727 (44.2) | 0.01 | 397 (45.2) | 378 (43.1) | 0.04 |
| Calcium channel blockers                                                    | 310 (33.1) | 1397 (35.7) | 0.06 | 290 (33)   | 320 (36.4) | 0.07 |
| Non-loop diuretics                                                          | 147 (15.7) | 763 (19.5)  | 0.10 | 141 (16.1) | 147 (16.7) | 0.02 |
| Loop diuretics                                                              | 179 (19.1) | 711 (18.2)  | 0.02 | 166 (18.9) | 179 (20.4) | 0.04 |
| Other antihypertensives                                                     | 131 (14)   | 446 (11.4)  | 0.08 | 123 (14)   | 121 (13.8) | 0.01 |
| Alpha blockers                                                              | 275 (29.4) | 1180 (30.2) | 0.02 | 254 (28.9) | 238 (27.1) | 0.04 |
| Anti-lipemic agents                                                         | 461 (49.3) | 2005 (51.3) | 0.04 | 436 (49.7) | 410 (46.7) | 0.06 |
| Antianginals                                                                | 91 (9.7)   | 384 (9.8)   | 0.00 | 86 (9.8)   | 87 (9.9)   | 0.00 |
| Anti-arrhythmics                                                            | 7 (0.7)    | 15 (0.4)    | 0.05 | 7 (0.8)    | 5 (0.6)    | 0.03 |
| Digitalis                                                                   | 9 (1)      | 56 (1.4)    | 0.04 | 9 (1)      | 10 (1.1)   | 0.01 |
| <b>Other medication classes used at hospital admission, No. (%)</b>         |            |             |      |            |            |      |
| Anti-histamines                                                             | 37 (4)     | 154 (3.9)   | 0.00 | 37 (4.2)   | 35 (4)     | 0.01 |
| Anti-microbials                                                             | 30 (3.2)   | 130 (3.3)   | 0.01 | 29 (3.3)   | 28 (3.2)   | 0.01 |
| Anti-neoplastics                                                            | 17 (1.8)   | 89 (2.3)    | 0.03 | 16 (1.8)   | 18 (2.1)   | 0.02 |
| Autonomic medications                                                       | 26 (2.8)   | 128 (3.3)   | 0.03 | 26 (3)     | 23 (2.6)   | 0.02 |
| Anticoagulants                                                              | 77 (8.2)   | 352 (9)     | 0.03 | 73 (8.3)   | 80 (9.1)   | 0.03 |
| Platelet aggregation inhibitors (including aspirin)                         | 81 (8.7)   | 397 (10.2)  | 0.05 | 80 (9.1)   | 78 (8.9)   | 0.01 |
| Other central nervous system medications                                    | 260 (27.8) | 1084 (27.7) | 0.00 | 247 (28.1) | 242 (27.6) | 0.01 |
| Non-opioid analgesics                                                       | 196 (20.9) | 818 (20.9)  | 0.00 | 183 (20.8) | 187 (21.3) | 0.01 |
| Opioid analgesics                                                           | 100 (10.7) | 449 (11.5)  | 0.03 | 97 (11)    | 87 (9.9)   | 0.04 |
| Sedatives and hypnotics                                                     | 160 (17.1) | 700 (17.9)  | 0.02 | 155 (17.7) | 154 (17.5) | 0.00 |
| Anti-convulsants                                                            | 214 (22.9) | 975 (24.9)  | 0.05 | 208 (23.7) | 186 (21.2) | 0.06 |
| Anti-depressants                                                            | 54 (5.8)   | 223 (5.7)   | 0.00 | 51 (5.8)   | 44 (5)     | 0.04 |
| Anti-psychotics                                                             | 465 (49.7) | 2021 (51.7) | 0.04 | 442 (50.3) | 442 (50.3) | 0.00 |
| Gastrointestinal medications                                                | 86 (9.2)   | 420 (10.7)  | 0.05 | 84 (9.6)   | 92 (10.5)  | 0.03 |
| Genitourinary medications                                                   | 279 (29.8) | 1144 (29.3) | 0.01 | 255 (29)   | 237 (27)   | 0.05 |
| Hormones                                                                    | 161 (17.2) | 820 (21)    | 0.10 | 156 (17.8) | 147 (16.7) | 0.03 |
| Insulin                                                                     | 169 (18.1) | 590 (15.1)  | 0.08 | 151 (17.2) | 154 (17.5) | 0.01 |

|                                                                                             |            |             |      |            |            |      |
|---------------------------------------------------------------------------------------------|------------|-------------|------|------------|------------|------|
| Non-insulin hypoglycemics                                                                   | 155 (16.6) | 768 (19.7)  | 0.08 | 151 (17.2) | 131 (14.9) | 0.06 |
| Musculoskeletal medications                                                                 | 38 (4.1)   | 197 (5)     | 0.05 | 36 (4.1)   | 41 (4.7)   | 0.03 |
| Systemic decongestants and antitussives                                                     | 0 (0)      | 0 (0)       | 0.00 | 0 (0)      | 0 (0)      | 0.00 |
| <b>Comorbidities, No. (%)</b>                                                               |            |             |      |            |            |      |
| Heart failure                                                                               | 319 (34.1) | 983 (25.2)  | 0.20 | 288 (32.8) | 296 (33.7) | 0.02 |
| Acute myocardial infarction                                                                 | 52 (5.6)   | 171 (4.4)   | 0.05 | 46 (5.2)   | 49 (5.6)   | 0.02 |
| Unstable angina and other acute ischemic heart disease                                      | 44 (4.7)   | 140 (3.6)   | 0.06 | 40 (4.6)   | 42 (4.8)   | 0.01 |
| Chronic angina and coronary artery disease                                                  | 381 (40.7) | 1536 (39.3) | 0.03 | 363 (41.3) | 361 (41.1) | 0.00 |
| Valvular/rheumatic heart disease                                                            | 118 (12.6) | 463 (11.8)  | 0.02 | 112 (12.8) | 122 (13.9) | 0.03 |
| Other cardiac disease including congenital heart and hypertensive disease                   | 630 (67.3) | 2317 (59.3) | 0.17 | 582 (66.3) | 588 (67)   | 0.01 |
| Arrhythmias and conduction disorders                                                        | 274 (29.3) | 1222 (31.3) | 0.04 | 260 (29.6) | 261 (29.7) | 0.00 |
| Pleural effusion/pneumothorax                                                               | 140 (15)   | 535 (13.7)  | 0.04 | 131 (14.9) | 130 (14.8) | 0.00 |
| Chest pain                                                                                  | 243 (26)   | 994 (25.4)  | 0.01 | 226 (25.7) | 228 (26)   | 0.01 |
| Syncope                                                                                     | 79 (8.4)   | 354 (9.1)   | 0.02 | 75 (8.5)   | 62 (7.1)   | 0.06 |
| Acute stroke/transient ischemic attack                                                      | 154 (16.5) | 620 (15.9)  | 0.02 | 146 (16.6) | 159 (18.1) | 0.04 |
| Pulmonary embolism/deep venous thrombosis                                                   | 150 (16)   | 577 (14.8)  | 0.03 | 140 (15.9) | 140 (15.9) | 0.00 |
| Other peripheral vascular disease                                                           | 217 (23.2) | 785 (20.1)  | 0.08 | 199 (22.7) | 212 (24.1) | 0.03 |
| Cardio-respiratory failure                                                                  | 43 (4.6)   | 172 (4.4)   | 0.01 | 40 (4.6)   | 37 (4.2)   | 0.02 |
| Chronic obstructive pulmonary disease/asthma                                                | 428 (45.7) | 1903 (48.7) | 0.06 | 411 (46.8) | 429 (48.9) | 0.04 |
| Pneumonia including aspiration pneumonitis                                                  | 562 (60)   | 2397 (61.3) | 0.03 | 526 (59.9) | 541 (61.6) | 0.03 |
| Septicemia/shock                                                                            | 187 (20)   | 735 (18.8)  | 0.03 | 171 (19.5) | 182 (20.7) | 0.03 |
| Urinary tract infection and urinary system complaints                                       | 478 (51.1) | 1975 (50.5) | 0.01 | 448 (51)   | 427 (48.6) | 0.05 |
| Cellulitis                                                                                  | 137 (14.6) | 590 (15.1)  | 0.01 | 129 (14.7) | 135 (15.4) | 0.02 |
| Clostridium difficile-associated infection                                                  | 7 (0.7)    | 38 (1)      | 0.02 | 7 (0.8)    | 7 (0.8)    | 0.00 |
| Renal disorders including renal failure and fluid, electrolyte, and acid-base abnormalities | 684 (73.1) | 2743 (70.2) | 0.06 | 636 (72.4) | 639 (72.8) | 0.01 |
| Anemia                                                                                      | 466 (49.8) | 1750 (44.8) | 0.10 | 432 (49.2) | 437 (49.8) | 0.01 |
| Gastrointestinal hemorrhage                                                                 | 106 (11.3) | 413 (10.6)  | 0.02 | 98 (11.2)  | 103 (11.7) | 0.02 |
| Diabetes and its complications                                                              | 546 (58.3) | 2053 (52.5) | 0.12 | 503 (57.3) | 492 (56)   | 0.03 |
| Fibrosis of lung and other chronic lung disorders                                           | 35 (3.7)   | 183 (4.7)   | 0.05 | 34 (3.9)   | 35 (4)     | 0.01 |
| Hip fracture                                                                                | 17 (1.8)   | 76 (1.9)    | 0.01 | 16 (1.8)   | 15 (1.7)   | 0.01 |
| Complications of care                                                                       | 153 (16.3) | 579 (14.8)  | 0.04 | 141 (16.1) | 152 (17.3) | 0.03 |
| Other lung disorders including acute, congenital, and unspecified lung abnormalities        | 485 (51.8) | 2074 (53.1) | 0.03 | 459 (52.3) | 477 (54.3) | 0.04 |
| Primary cancer of the trachea, bronchus, lung, and pleura                                   | 41 (4.4)   | 231 (5.9)   | 0.07 | 39 (4.4)   | 44 (5)     | 0.03 |
| Other infections                                                                            | 517 (55.2) | 2184 (55.9) | 0.01 | 483 (55)   | 485 (55.2) | 0.00 |
| Cancer                                                                                      | 273 (29.2) | 1330 (34)   | 0.10 | 263 (30)   | 254 (28.9) | 0.02 |
| Endocrine/metabolic                                                                         | 840 (89.7) | 3518 (90)   | 0.01 | 791 (90.1) | 778 (88.6) | 0.05 |
| Liver disease                                                                               | 86 (9.2)   | 371 (9.5)   | 0.01 | 81 (9.2)   | 84 (9.6)   | 0.01 |

|                                                    |            |             |      |            |            |      |
|----------------------------------------------------|------------|-------------|------|------------|------------|------|
| Digestive (Gastrointestinal)                       | 651 (69.6) | 2850 (72.9) | 0.07 | 618 (70.4) | 612 (69.7) | 0.01 |
| Musculoskeletal                                    | 768 (82.1) | 3227 (82.6) | 0.01 | 724 (82.5) | 722 (82.2) | 0.01 |
| Other hematologic                                  | 217 (23.2) | 873 (22.3)  | 0.02 | 200 (22.8) | 200 (22.8) | 0.00 |
| Cognitive                                          | 227 (24.3) | 881 (22.5)  | 0.04 | 215 (24.5) | 224 (25.5) | 0.02 |
| Substance abuse                                    | 115 (12.3) | 509 (13)    | 0.02 | 110 (12.5) | 104 (11.8) | 0.02 |
| Psychiatric                                        | 417 (44.6) | 1814 (46.4) | 0.04 | 398 (45.3) | 376 (42.8) | 0.05 |
| Development disorders                              | 17 (1.8)   | 65 (1.7)    | 0.01 | 17 (1.9)   | 17 (1.9)   | 0.00 |
| Spinal cord                                        | 36 (3.8)   | 181 (4.6)   | 0.04 | 35 (4)     | 39 (4.4)   | 0.02 |
| Neuromuscular                                      | 494 (52.8) | 2195 (56.2) | 0.07 | 473 (53.9) | 471 (53.6) | 0.00 |
| Non-acute cerebrovascular disease                  | 167 (17.8) | 693 (17.7)  | 0.00 | 156 (17.8) | 168 (19.1) | 0.04 |
| Other pulmonary                                    | 43 (4.6)   | 168 (4.3)   | 0.01 | 38 (4.3)   | 40 (4.6)   | 0.01 |
| Ophthalmologic                                     | 652 (69.7) | 2801 (71.7) | 0.04 | 608 (69.2) | 591 (67.3) | 0.04 |
| Ear, nose, and throat                              | 473 (50.5) | 2129 (54.5) | 0.08 | 454 (51.7) | 464 (52.8) | 0.02 |
| Other renal                                        | 274 (29.3) | 1043 (26.7) | 0.06 | 252 (28.7) | 247 (28.1) | 0.01 |
| Genitourinary                                      | 626 (66.9) | 2671 (68.3) | 0.03 | 583 (66.4) | 563 (64.1) | 0.05 |
| Other dermatologic                                 | 433 (46.3) | 1909 (48.8) | 0.05 | 408 (46.5) | 414 (47.2) | 0.01 |
| Injury excluding hip fracture                      | 221 (23.6) | 956 (24.5)  | 0.02 | 205 (23.3) | 204 (23.2) | 0.00 |
| Symptoms (major and minor) excluding respiratory   | 503 (53.7) | 2152 (55.1) | 0.03 | 474 (54)   | 473 (53.9) | 0.00 |
| Miscellaneous surgical and non-surgical procedures | 915 (97.8) | 3836 (98.2) | 0.03 | 858 (97.7) | 855 (97.4) | 0.02 |
| Durable medical equipment                          | 307 (32.8) | 1277 (32.7) | 0.00 | 289 (32.9) | 289 (32.9) | 0.00 |
| Other                                              | 773 (82.6) | 3325 (85.1) | 0.07 | 733 (83.5) | 733 (83.5) | 0.00 |
| Skin ulcer including decubitus ulcer               | 114 (12.2) | 440 (11.3)  | 0.03 | 106 (12.1) | 114 (13)   | 0.03 |

**Abbreviations:** BP, blood pressure; SMD, standardized mean difference; VISN, Veterans Integrated Service Networks; PDC, proportion of days covered

**eTable 7.** Secondary Clinical Outcomes Associated with Receiving Antihypertensive Intensifications at Hospital Discharge in Well-Controlled and Elevated Baseline Blood Pressure Subgroups

|                         | Previously Controlled BP Subgroup (SBP<140 mmHg) <sup>a</sup> |                          |                       |                           | Previously Elevated BP Subgroup (SBP≥140 mmHg) <sup>b</sup> |                         |                       |                           |
|-------------------------|---------------------------------------------------------------|--------------------------|-----------------------|---------------------------|-------------------------------------------------------------|-------------------------|-----------------------|---------------------------|
|                         | Intensified (N=1122)                                          | Not Intensified (N=1122) | Hazard Ratio (95% CI) | NNH (95% CI) <sup>c</sup> | Intensified (N=878)                                         | Not Intensified (N=878) | Hazard Ratio (95% CI) | NNH (95% CI) <sup>c</sup> |
|                         | <i>No. with event</i>                                         |                          |                       |                           | <i>No. with event</i>                                       |                         |                       |                           |
| <b>30 Day Outcomes</b>  |                                                               |                          |                       |                           |                                                             |                         |                       |                           |
| Mortality               | 51                                                            | 56                       | 0.92 (0.62 to 1.35)   | NA                        | 32                                                          | 49                      | 0.66 (0.42 to 1.03)   | NA                        |
| Cardiovascular events   | 38                                                            | 20                       | 1.91 (1.11 to 3.29)   | 63 (34 to 345)            | 32                                                          | 20                      | 1.61 (0.92 to 2.81)   | NA                        |
| <b>365 Day Outcomes</b> |                                                               |                          |                       |                           |                                                             |                         |                       |                           |
| Mortality               | 275                                                           | 274                      | 1.01 (0.85 to 1.19)   | NA                        | 198                                                         | 225                     | 0.86 (0.71 to 1.04)   | NA                        |
| Readmissions            | 676                                                           | 588                      | 1.24 (1.11 to 1.39)   | 13 (8 to 27)              | 516                                                         | 530                     | 0.97 (0.86 to 1.09)   | NA                        |
| Serious adverse events  | 242                                                           | 217                      | 1.13 (0.94 to 1.36)   | NA                        | 169                                                         | 175                     | 0.96 (0.78 to 1.19)   | NA                        |

Abbreviations: BP, blood pressure; NNH, number needed to harm

Note: Patients were censored at either 30 days or 365 days following index hospitalization discharge as indicated in Table. Hazard ratios for mortality generated from Cox proportional hazard models. For all other outcomes, sub-distribution hazards were generated from competing risk regression models, accounting for the competing risk of death. Serious adverse events were defined as first emergency department visit or hospitalization for injurious fall, syncope, hypotension, electrolyte abnormalities, or acute kidney injury. Cardiovascular events were defined as first emergency department visit or hospitalization for acute myocardial infarction, unstable angina, stroke, heart failure, and hypertension.

<sup>a</sup> Propensity matching and survival analyses were performed separately for this sub-group of patients in which previously controlled BP was defined to include all patients with an outpatient systolic BP <140 mmHg prior to index hospitalization.

<sup>b</sup> Propensity matching and survival analyses were performed separately for this sub-group of patients in which previously elevated BP was defined to include all patients with an outpatient systolic BP ≥140 mmHg prior to index hospitalization.

<sup>c</sup> The NNH was only estimated when there was a statistically significant direction of treatment effect

**eTable 8.** Changes in Systolic Blood Pressure Following Hospital Discharge in Elevated and Well-Controlled Baseline BP Subgroups

A) Subgroup patients with well-controlled baseline pre-hospitalization SBP (<140 mmHg)

|                                                 | <b>Systolic Blood Pressure, Mean (95% CI), mmHg</b> |                        |
|-------------------------------------------------|-----------------------------------------------------|------------------------|
|                                                 | <b>Intensified</b>                                  | <b>Not intensified</b> |
| Baseline SBP <sup>a</sup>                       | 125.6 (124.8 to 126.4)                              | 125.4 (124.6 to 126.2) |
| Post-baseline SBP <sup>b</sup>                  | 130.4 (129.0 to 131.9)                              | 130.2 (128.7 to 131.7) |
| Pre-post change                                 | 4.8 (3.1 to 6.5)                                    | 4.7 (3.0 to 6.4)       |
| Difference-in-differences estimate <sup>c</sup> | 0.0 (-2.2 to 2.4)                                   |                        |

B) Subgroup patients with elevated baseline pre-hospitalization SBP ( $\geq$ 140 mmHg)

|                                                 | <b>Systolic Blood Pressure, Mean (95% CI), mmHg</b> |                        |
|-------------------------------------------------|-----------------------------------------------------|------------------------|
|                                                 | <b>Intensified</b>                                  | <b>Not intensified</b> |
| Baseline SBP <sup>a</sup>                       | 153.8 (152.6 to 155.0)                              | 154.3 (153.1 to 155.4) |
| Post-baseline SBP <sup>b</sup>                  | 139.5 (137.8 to 141.3)                              | 141.0 (139.2 to 142.8) |
| Pre-post change                                 | -14.2 (-16.2 to -12.2)                              | -13.2 (-15.4 to -11.0) |
| Difference-in-differences estimate <sup>c</sup> | -1.0 (-4.0 to 2.0)                                  |                        |

<sup>a</sup> Indicates pre-hospitalization outpatient BP, recorded as median of 3 outpatient BPs collected in the one year prior to index hospitalization

<sup>b</sup> The post-baseline SBP was assessed prior to censoring and as the BP recorded at the closest date to 1 year following index hospitalization discharge, within the range for 6 to 18 months following discharge.

<sup>c</sup> Calculated as the pre-post change in SBP for the intensified group minus the pre-post change in SBP for the not intensified group.

**eFigure 1.** Primary Cohort Propensity Score Balance Diagnostics  
A) Propensity Score Distribution Before and After Matching

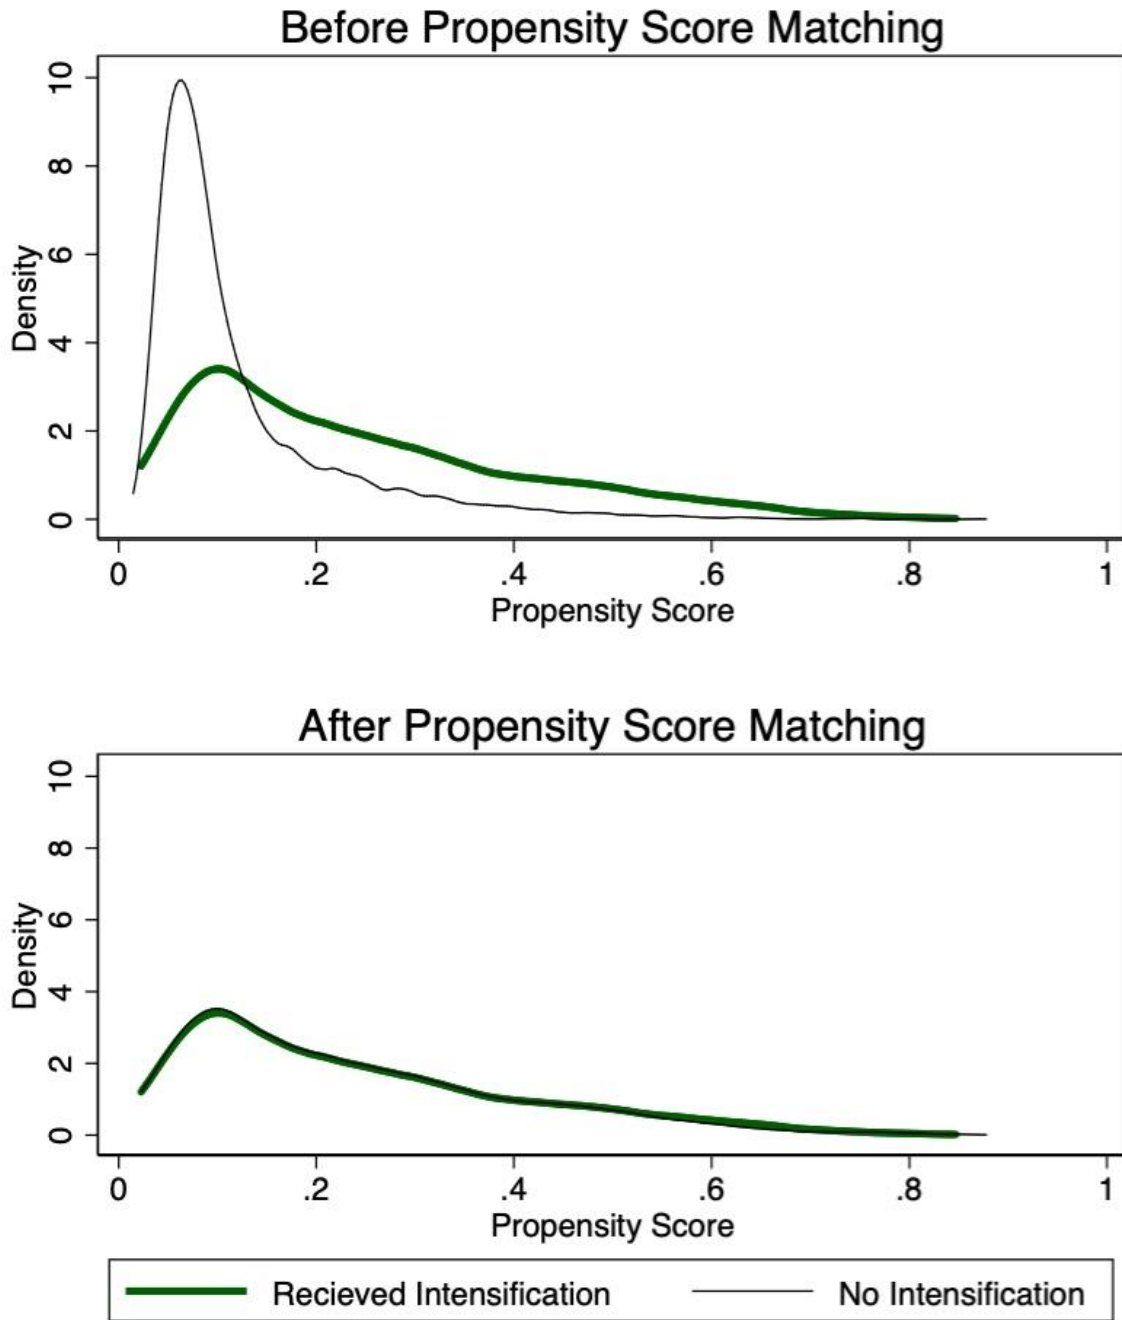



## B) Standard Mean Differences of Covariates, Before and After Matching

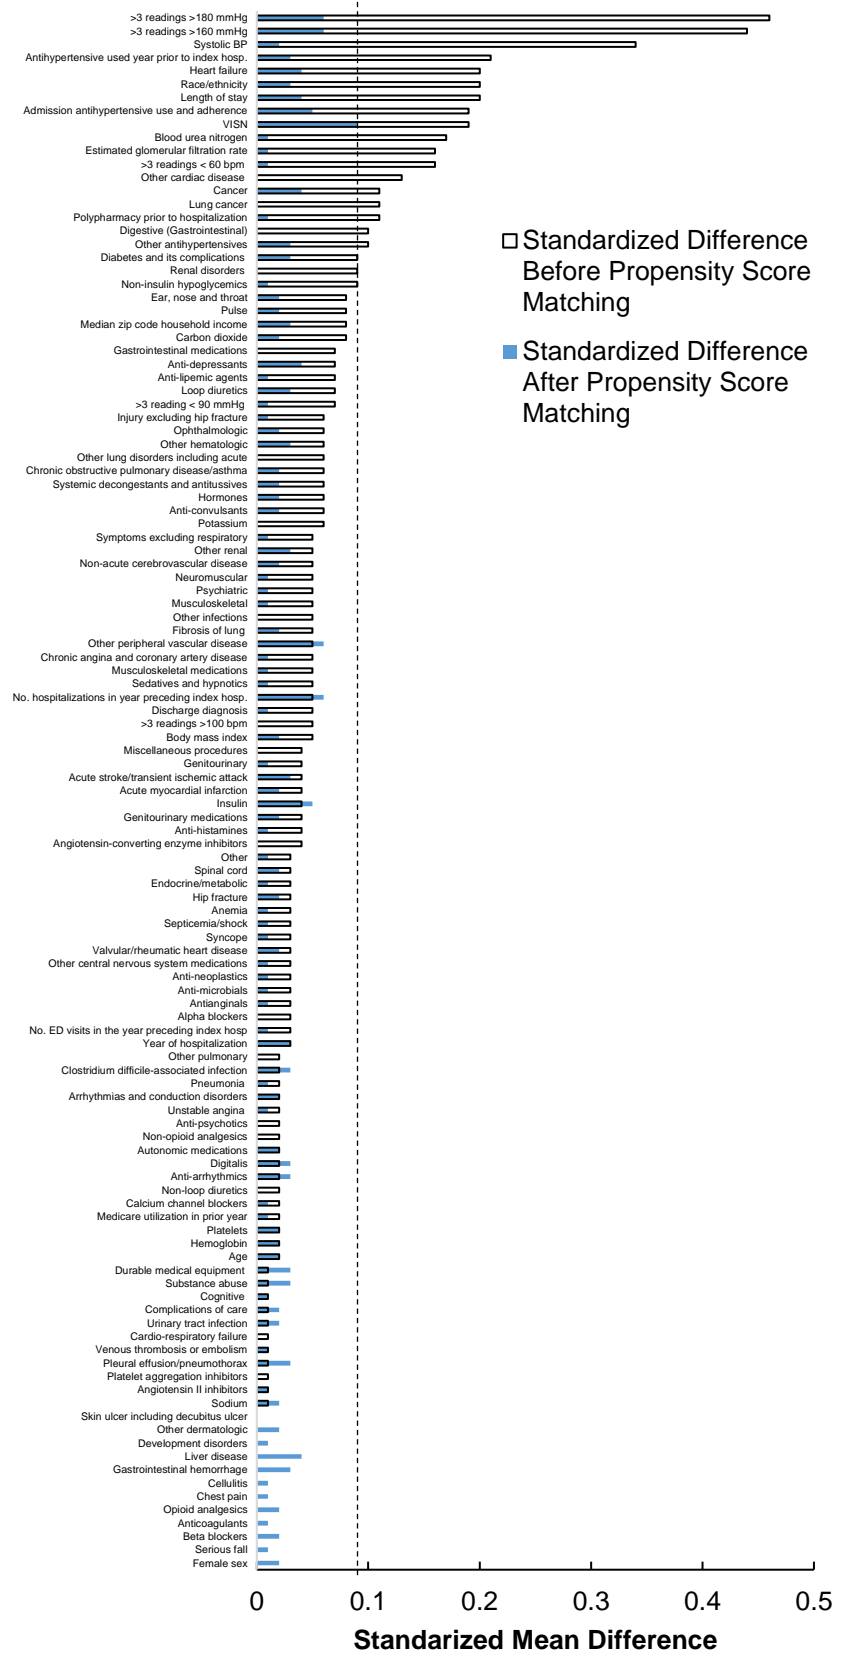

**eFigure 2.** Propensity Score Distribution Before and After Matching  
A) Well-Controlled Pre-Hospitalization Baseline Blood Pressure Subgroup

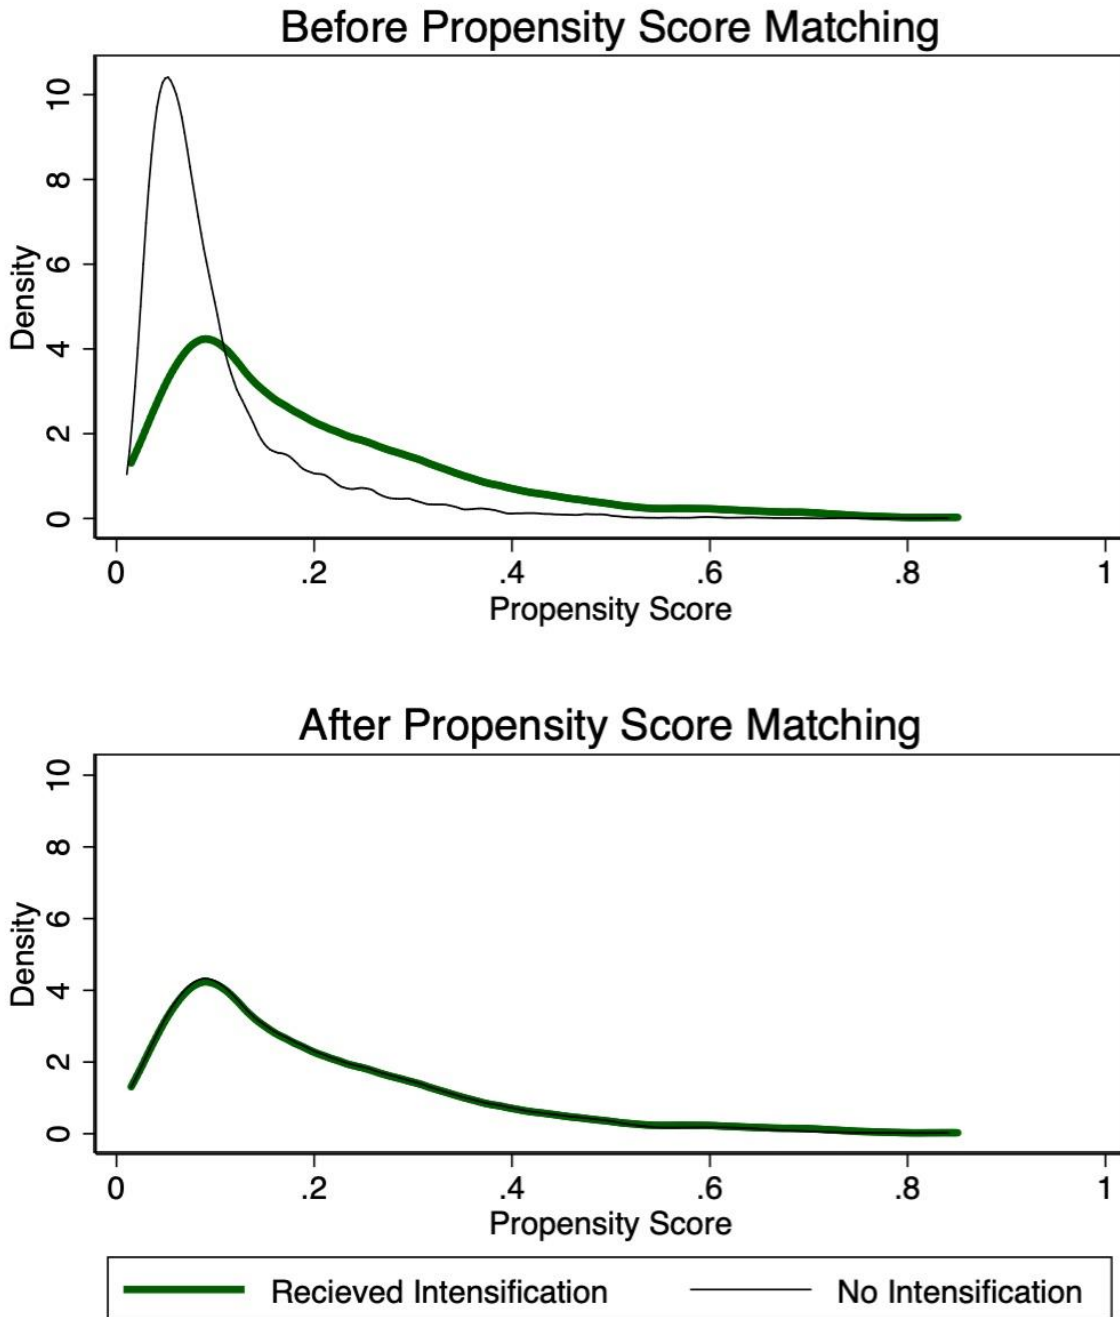

A) Elevated Pre-Hospitalization Baseline Blood Pressure Subgroup

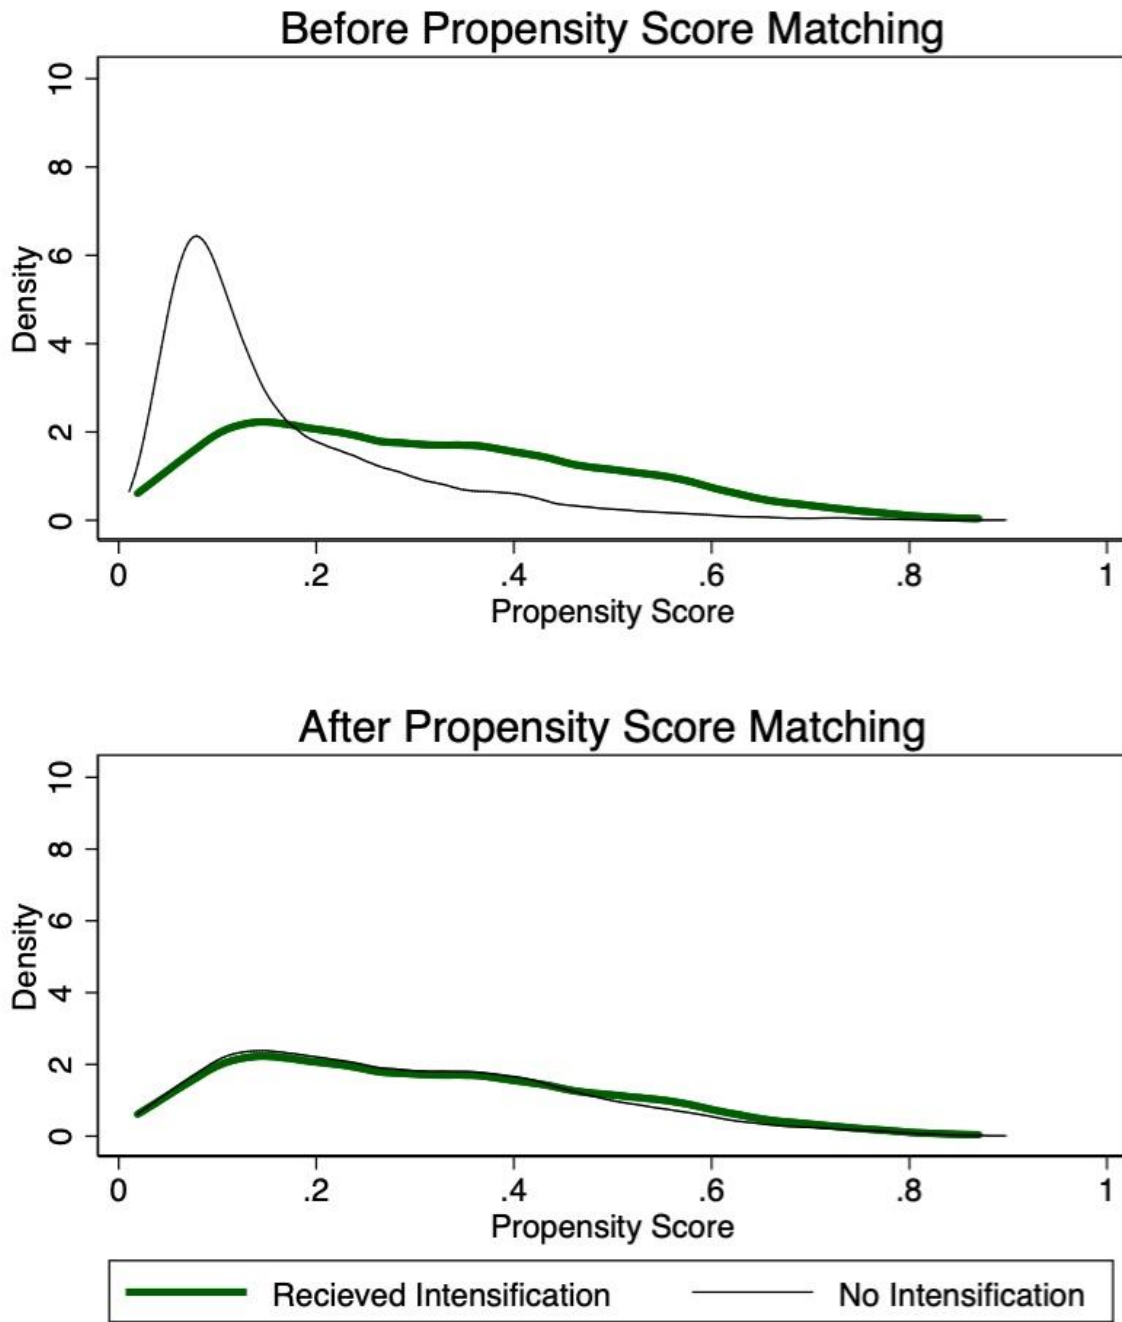

Supplement: jamainternmed-179-1528-s001.pdf [file jamainternmed-179-1528-s001.pdf]
